## Title: Eco-evolutionary significance of ‘loners’

**Authors:** Fernando W. Rossine<sup>1,§</sup>, Ricardo Martinez-Garcia<sup>1,§</sup>, Allyson E. Sgro<sup>2,†</sup>, Thomas Gregor<sup>2,\*</sup>, Corina E. Tarnita<sup>1,\*</sup>

**Affiliations:** <sup>1</sup> Department of Ecology and Evolutionary Biology, Princeton University, Princeton NJ 08544, USA

<sup>2</sup> Joseph Henry Laboratories of Physics and Lewis-Sigler Institute for Integrative Genomics, Princeton University, Princeton, NJ 08544, USA

§ Equal contribution

\* Corresponding author

† Current address: Department of Biomedical Engineering and the Biological Design Center, Boston University, Boston, MA 02215

**Abstract:** Loners, individuals out-of-sync with a coordinated majority, occur frequently in nature. Are loners incidental byproducts of large-scale synchronization attempts or are they part of a mosaic of life-history strategies? Here, we provide the first empirical evidence of naturally occurring heritable variation in loner behavior, using the social amoeba *Dictyostelium discoideum*. Moreover, we show that *Dictyostelium* loners—cells that do not join the multicellular life-stage—result from a dynamic population-partitioning process. Underlying this partitioning, we find evidence that each cell makes a stochastic, signal-based decision resulting in an imperfectly synchronized multicellular development affected by both abiotic (environmental porosity) and biotic (strain-specific signaling) factors. Finally, we predict that when strains differing in their partitioning behavior co-occur, cross-signaling impacts slime-mold diversity across spatio-temporal scales. Loners are therefore critical to understanding collective and social behaviors, multicellular development, and ecological dynamics in *D. discoideum*. More broadly, across taxa, imperfect synchronization might be adaptive by enabling diversification of life-history strategies.

## 33 Introduction

34 Collective behaviors, in which a large number of individuals exhibit some degree of behavioral  
35 synchronization, are frequent across the tree of life and across spatio-temporal scales: from  
36 microbial aggregates to the great wildebeest migration, from locust swarming to synchronized  
37 bamboo flowering, from fish schooling to mechanical adaptation in honeybee clusters (Couzin &  
38 Krause, 2003; Gregor, Fujimoto, Masaki, & Sawai, 2010; Hopcraft et al., 2015; Janzen, 1976;  
39 Kaiser & Crosby, 1983; Katz, Tunstrom, Ioannou, Huepe, & Couzin, 2011; Peleg, Peters, Salcedo,  
40 & Mahadevan, 2018; Simpson, McCaffery, & Hägele, 1999). Intriguingly, however, such  
41 synchronization is sometimes imperfect and ‘out-of-sync’ individuals (henceforth loners), have  
42 been reported in several of these systems. For instance, in locusts, population crowding prompts a  
43 transition from a solitary phase, in which individuals repel each other, to a gregarious phase, in  
44 which they attract each other. Experiments show, however, that not all individuals undergo this  
45 transition, even if exposed to long periods of crowding (Simpson et al., 1999). In wildebeest,  
46 hundreds of thousands of individuals coordinate with each other and organize herding migrations,  
47 but resident populations, that fail to migrate, also exist (Hopcraft et al., 2015). Similarly,  
48 wildebeest calving times are also highly coordinated, but some fraction of the calves are born  
49 outside the calving period (Hopcraft et al., 2015). In bamboo, individuals predominantly flower in  
50 synchronized masts, but sporadic out-of-sync events have also been recorded (Janzen, 1976).

51 The roots of imperfect synchronization will undoubtedly differ across systems. Nevertheless, the  
52 occurrence of imperfect synchronization across such different systems and scales raises  
53 fundamental questions about its causes and consequences. Are loners mistakes—merely inevitable  
54 byproducts of large scale synchronization attempts—or are they a variable trait that selection can  
55 shape with potential ecological consequences? Theoretical investigations of such loner behaviors  
56 have been sparse, but the handful of existing studies have suggested that, at least in some systems,  
57 they could be a means of spatio-temporal niche-partitioning (Dubravcic, van Baalen, & Nizak,  
58 2014) that promotes diversity (Martínez-García & Tarnita, 2017; Tarnita, Washburne, Martínez-  
59 García, Sgro, & Levin, 2015). However, despite this theoretically established potential, variability  
60 and heritability of loner behaviors have not been characterized in natural populations. Thus, there  
61 exists no empirical evidence, in any system, that loners are anything more than chance stragglers,  
62 lacking an avenue for selection to act on them.

63 The cellular slime mold *Dictyostelium discoideum* is an ideal system in which to experimentally  
64 characterize loner behaviors. Its life cycle comprises a unicellular feeding stage and a starvation-  
65 induced multicellular stage—the result of a developmental process involving coordinated cell  
66 aggregation, which culminates in the production of starvation-resistant spores (Bonner, 2009).  
67 There has been extensive progress in understanding this multicellular stage (Bonner, 2009; Gregor  
68 et al., 2010; Strassmann & Queller, 2011), but less attention has been paid to the potential role of  
69 asocial aspects—such as the non-aggregating solitary loner-cells—in development. Loners die  
70 under sustained starvation, but they persist temporarily (Dubravcic, 2013); if food is replenished,  
71 they eat and divide, and their progeny subsequently recapitulate the multicellular development  
72 (Tarnita et al., 2015). Finally, it has been shown that knockout strains can have different loner  
73 behaviors (Dubravcic et al., 2014). Altogether, these observations suggest that loners could indeed  
74 be part of a life-history strategy in *D. discoideum*. However, to fully establish this, one needs to  
75 show (a) that there are evolutionary paths such that loner behavior can be tuned while populations  
76 retain viability in their natural environments and (b) that there are fitness differences between  
77 strains with different loner behaviors in natural environments. Here we tackle (a) by inspecting

78 loner behavior in naturally occurring strains; in the process, we uncover the cellular decision-  
79 making rules underlying the aggregator-loner partitioning and explore their potential ecological  
80 consequences.

## 81 **Results and Discussion**

### 82 **The aggregator-loner partitioning is heritable and context-dependent**

83 To determine whether the loner behavior is heritable—and, thus, whether there is the potential for  
84 natural selection to act on it—we developed an experimental protocol to identify individual loner  
85 cells (Fig. 1a,b), permitting us to characterize their spatial distribution (Fig. 1c, Fig. S1) and  
86 quantify their density (Fig. 1d,e, Fig. S2). Importantly, we worked with three natural isolates (i.e.  
87 strains or genetic variants) that were collected from the same location to ensure that observed  
88 behaviors of individual strains were not an artifact of lab rearing and that observed behavioral  
89 differences among strains reflected naturally co-occurring strategies. When homogeneously plated  
90 cells of a given strain were left to starve and undergo multicellular development, loner cells were  
91 found throughout aggregation territories, with a higher density at territory borders and at  
92 experimental boundary conditions than in the immediate surroundings of aggregation centers (Fig  
93 1c, Fig. S1). In repeated experiments under controlled conditions, loner densities of a given strain  
94 fell consistently within a conserved distribution (framed portion of Fig. 1e); moreover, the loner  
95 distributions of some strains were significantly different in their mean and variance (compare  
96 strains NC28.1 and NC85.2 in Fig. 1d, and framed portion of Fig. 1e). These findings demonstrate  
97 that the aggregator-loner partitioning behavior is heritable and thus has the potential to be shaped  
98 by selection.

99 To characterize the underlying developmental process, it must first be determined whether a cell's  
100 decision to commit to aggregation or remain a loner is context-independent (Dubravcic et al., 2014;  
101 Tarnita et al., 2015) (the result of a stochastic switch) or whether it depends on external factors. If  
102 it is context-independent, then loner density should increase linearly with the density of initially  
103 plated cells, i.e., the heritable quantity would be the fraction of loners, as previously posited  
104 (Dubravcic et al., 2014; Tarnita et al., 2015). Instead, we found a non-linear dependence: at low  
105 initial densities, cells were too sparse for aggregation to occur and all cells remained loners; above  
106 a threshold, aggregation occurred with increasing efficiency and loner densities decreased;  
107 surprisingly, at high initial cell densities, loner densities plateaued (Fig. 1d, Fig. S2c-k). Thus, past  
108 a range of initial densities, it is the *number* (or density), and not the *fraction*, of loners that is  
109 heritable, suggesting an underlying cell decision-making process that is fundamentally different  
110 from a stochastic switch. Furthermore, when we varied the porosity of the agar substrate—a proxy  
111 for an important environmental characteristic for this soil-dwelling amoeba—less porous (more  
112 concentrated) agar yielded higher loner densities (Fig. 1e), and differentially affected *D.*  
113 *discoideum* strains by enhancing the difference between strains that leave fewer loners ('better  
114 aggregators') and those that leave more loners ('worse aggregators'). Interestingly, the agar  
115 porosity affects not only the mean number of loners, but also the variance (Fig. 1e). Altogether,  
116 these findings demonstrate that the heritable aggregator-loner partitioning is context-dependent—  
117 the result of a density-dependent decision-making process (Balázsi, Van Oudenaarden, & Collins,  
118 2011) that interacts with the abiotic environment.

119 **The aggregator-loner partitioning is the result of an abiotically-modulated quorum-based**  
120 **stochastic process.**

121 To identify the properties of this decision-making process, we constructed a spatially explicit  
122 individual-based model (Fig. S3; see Methods) starting from a limited set of assumptions: that the  
123 strain-specific partitioning behavior results from imperfect synchronization in the developmental  
124 program, and that this asynchrony stems from a stochastic response to cell-population densities  
125 (i.e., quorum sensing). Consistent with our experimental design, we started with a population of  
126 cells immediately after food exhaustion and assumed them to be in a pre-aggregating state,  $P$ .  $P$ -  
127 cells emit extracellular signaling molecules at a strain-specific rate  $\gamma$ ; signal diffuses with diffusion  
128 coefficient  $D$  and serves a quorum-sensing purpose (Gregor et al., 2010; Loomis, 2014) that  
129 regulates the stochastic transition to the aggregating state,  $A$ : when the signal perceived by a cell  
130 exceeds the strain-specific sensitivity threshold  $\theta$  (i.e. the quorum is met), that cell has a strain-  
131 specific probability  $\lambda$  per unit time of becoming an aggregating  $A$ -cell.  $A$ -cells continue to emit  
132 signal and move towards the aggregation center with constant, strain-specific velocity  $v$ . At the  
133 center, cells become multicellular ( $M$ -state) and stop emitting signal. Importantly, we do not  
134 impose restrictions on the nature of the signaling molecule or on the sensing mechanism, and the  
135 model employs this molecule broadly to fulfill both a traditional (Gomer, Yuen, & Firtel, 1991;  
136 Loomis, 2014) and a dynamical quorum sensing role (Gregor et al., 2010).

137 Because our model is focused on population partitioning, it deliberately simplifies certain  
138 dynamics (Dallon & Othmer, 1997; Gregor et al., 2010; Keller & Segel, 1970; Kessler & Levine,  
139 1993; Palsson & Othmer, 2000; Sawai, Thomason, & Cox, 2005) and it bundles many possible  
140 intermediate states that make up the  $P$ -to- $A$  transition: for example, before aggregating, cells must  
141 sequentially starve, become excitable by cAMP (Clarke & Gomer, 1995; Jain, Yuen, Taphouse, &  
142 Gomer, 1992), and finally chemotax (Gregor et al., 2010). Moreover, for computational  
143 convenience, our model simplifies various sources of stochasticity that arise during the  
144 developmental process, such as the existence of multiple aggregation territories and the variable  
145 boundary shapes between them. This prevents us from studying the sources and dynamics of the  
146 variance in loner density, an important direction for future work. Nevertheless, this reduced model  
147 is powerful enough to qualitatively recapitulate all other properties of the observed population  
148 partitioning (Fig. 1f; Fig. S4a-e). Importantly, the model recovers the plateau in the loner counts  
149 as a function of initially-plated cell density (Fig. 1f; Fig. S4a-d; Box 1 and SI Appendix) and it  
150 provides an intuition for the identity of the loners (Fig. 2): they are  $P$ -cells that did not make the  
151 probabilistic transition to the  $A$ -state when they had a quorum and that are left without a quorum  
152 when enough of their neighbors underwent the  $P$ -to- $A$  transition and moved towards the  
153 aggregation center.

154 Total loner density then depends on how quickly  $P$ -cells switch to the  $A$ -state relative to how  
155 quickly they are left without a quorum ( $\lambda/v$ ), and on how easy it is to maintain a quorum (see Fig.  
156 S4a-d, Box 1 and SI Appendix for analytical results). Thus, the larger the  $P$ -to- $A$  transition rate  $\lambda$ ,  
157 the fewer loner cells are left behind since  $P$ -cells sensing a quorum switch faster to the  $A$ -state;  
158 conversely, the larger the aggregation speed  $v$ , the more loners are left behind since  $A$ -cells move  
159 away faster and leave their  $P$ -cell neighbors without a quorum (Fig. S4c). Consequently, the farther  
160 a cell is from the aggregation center, the sooner it is left without a quorum and the more likely it  
161 is to become a loner (Fig. S4e), which explains our experimentally observed spatial distribution  
162 (Fig. 1c).

163 Achieving and maintaining a quorum depends on the ratio between the sensitivity threshold and  
164 the signaling rate,  $\kappa = \theta/\gamma$ , and on the signal diffusivity,  $D$ . Higher  $\kappa$  leads to more loners because  
165 more neighbors are required for a quorum (Fig. S4d). Similarly, lower diffusivities result in higher

166 loner densities (Fig. S4f,g) because the signal remains highly concentrated around the emitters,  
167 and cells need to be more densely packed to maintain a quorum (Fig. S4h,i). Moreover, decreasing  
168 the diffusivity differentially affects worse and better aggregators (Fig. 1g, Fig. S4f,g), because  
169 diffusivity and signal spreading are nonlinearly related (see Methods). These results mirror the  
170 experimentally determined dependence of loner densities on agar concentration, suggesting signal  
171 diffusivity as a potential mediator of this dependency. Because loner densities responded to agar-  
172 concentration changes in a range that should not impede the diffusion of cAMP (Johnson, Berk,  
173 Jain, & Deen, 1996; Pluen, Netti, Jain, & Berk, 1999), these results further suggest that at least  
174 one of the molecules involved in the quorum-dependent transition should be large—for example,  
175 conditioned medium factor (CMF)(Gomer et al., 1991), prestarvation factor (PSF) counting factor  
176 (Kolbinger et al., 2005), counting factor (Brock & Gomer, 1999) or phosphodiesterase  
177 (Bodenschatz, Bae, & Prabhakara, 2017).

178 Notably, PSF and CMF are secreted during the growth phase and early starvation. This led us to  
179 investigate the potential role that these earlier signaling stages could play in regulating loner  
180 behavior. To test this hypothesis, we let cells grow in bacterial suspension until resources are  
181 depleted, and only subsequently plated them in agar gels. Thus, the initial responses to resource  
182 depletion occur in a well-mixed environment, and any signaling molecules secreted in this phase  
183 should synchronously reach all cells. If early signaling is responsible both for the loner differences  
184 between strains and for the effects of agar concentration on loners, we predicted that the well-  
185 mixed environment should produce the same effects as increasing diffusion in our model (Fig 1g).  
186 First, the increased signaling synchrony should decrease the loner number of any given strain;  
187 second, strains that had more synchronous signaling to begin with (i.e. better aggregators) should  
188 be less affected by this treatment than strains that started out with less synchronous signaling (i.e.  
189 worse aggregators), which would cause the differences between strains to decrease. Consistent  
190 with these predictions, we found that the loner counts decreased dramatically for the worse  
191 aggregator, leading to a reduction in the difference between strains (Fig. 3). This supports our  
192 hypothesis that vegetative or early starvation signaling—and not the later, cAMP relay signaling  
193 and synchronization, as previously inferred using knockouts (Dubravcic et al., 2014)—could be a  
194 critical stage at which loner behavior is regulated and the natural variation that we observed is  
195 produced.

### 196 **The aggregator-loner partitioning depends on the identity of neighboring cells.**

197 Collectively, the results above show that the population partitioning stems from interactions  
198 between genotype and environment and suggest that cell signaling mediates these interactions.  
199 This raises the possibility that a strain's partitioning could also be influenced by the presence of  
200 other strains via cross-signalling. If a cell's commitment to aggregation were independent of the  
201 identity of co-occurring strains, a mix of strains would leave behind a total mixed loner density  
202 that is the linear combination of the two strains' loner densities (see Methods). Our model,  
203 however, predicts developmental interactions between co-occurring strains that produce a diversity  
204 of departures from linearity (Fig. 4a; Fig. S5).

205 When we plated well-mixed cells of the strains NC28.1 (better aggregator) and NC85.2 (worse  
206 aggregator) at different frequencies and left them to co-develop under starvation conditions we  
207 found agreement with this theoretical prediction. The total loner density of the mixed strains  
208 deviated significantly from the linear combination, mapping out a sigmoidal curve (Fig. 4b, Fig.  
209 S6), which was one of three possible theoretical outcomes. Thus, when the better aggregator was  
210 more abundant in the mix (25%:75%) there were fewer total loners than predicted by the linear

211 combination; conversely, when the worse aggregator was more abundant (75%:25%) there were  
212 more total loners. That strains influence each other's partitioning is consistent with existing results  
213 using knockouts (Dubravcic et al., 2014) and it is particularly interesting in light of prior work  
214 showing that, during aggregation, *D. discoideum* cells do not perfectly discriminate against non-  
215 kin and genetically heterogeneous multicellular aggregates occur naturally (Strassmann, Zhu, &  
216 Queller, 2000), allowing for potential interactions between strains that can alter each other's life-  
217 history investments (Buttery, Rozen, Wolf, & Thompson, 2009; Strassmann & Queller, 2011).  
218 Whether or not such interactions occur within the aggregate (Martínez-García & Tarnita, 2016;  
219 Tarnita et al., 2015; J. B. B. Wolf et al., 2015), our results reveal that they do occur earlier in the  
220 developmental process.

221 Such developmental interactions that alter life history investments could severely impact strain  
222 fitness, alter *D. discoideum* diversity, and threaten the persistence of the social behavior  
223 (Strassmann & Queller, 2011). It is therefore crucial to understand their consequences for  
224 individual strains. In our case, the theoretical model produced two possible outcomes of co-  
225 development (see SI Appendix): the two co-occurring strains can become either (i) more similar  
226 (Fig. S7a,b) or (ii) more different (Fig. S7c,d) in their partitioning behavior. In particular, when  
227 the theoretical density of the mixed-strain loners had a sigmoidal shape similar to that derived  
228 experimentally, the loners of the better aggregator quickly went to zero as the frequency of the  
229 worse aggregator in the mix increased (Fig. S7c,d). Thus, the better aggregator became even better  
230 in the presence of the worse aggregator, enhancing the difference between the two strains (case ii).  
231 This occurred because the more sluggish loners of the worse aggregator maintained quorum long  
232 enough for the better aggregator to aggregate perfectly. Experimentally, the spatial distribution of  
233 the mixed-strain loners provides insight into their potential composition (Fig. 4c,d): as soon as the  
234 worse aggregator is part of the mix (even at the lowest frequency), the spatial distribution of the  
235 mixed loners is almost identical to that of the worse aggregator—and strikingly different from that  
236 of the better aggregator—suggesting that, as predicted, the mixed-strain loners predominantly  
237 comprise the worse aggregator. Importantly, developmental interactions between co-occurring  
238 strains do indeed have consequences for the life history investments of individual strains.

### 239 **Cross-signaling may foster slime mold diversity across spatio-temporal scales.**

240 The two possible outcomes of co-development predicted by our population-partitioning model are  
241 reminiscent of two classical evolutionary routes to diversity maintenance—quasi-neutrality (case  
242 i; Fig. 5a) and character displacement (case ii; Fig. 5b)—and are therefore likely to have  
243 consequences for slime-mold diversity. To investigate these biodiversity consequences of strains  
244 mixing and co-developing—instead of perfectly segregating and avoiding co-development—we  
245 incorporated our population-partitioning model into an existing model of competition for resources  
246 over multiple successive growth-starvation (Martínez-García & Tarnita, 2016, 2017; Tarnita et al.,  
247 2015) (Fig. S8; see Methods). Although empirically we did not investigate fitness differences  
248 between strains, here we assume that such differences exist and depend on the environmental  
249 conditions as in prior work (Martínez-García & Tarnita, 2016, 2017; Tarnita et al., 2015). The  
250 environment is characterized by the mean time between nutrient replenishment events. We  
251 considered both deterministic environments (all replenishment times of equal size) and stochastic  
252 environments (exponentially distributed nutrient replenishment times). For each, we explored a  
253 range of mean nutrient replenishment times. Regardless of whether co-development occurs, within  
254 any environment, there was competitive exclusion: consistent with previous work, we found that  
255 strains that leave behind more (fewer) loners are more competitive in environments with shorter

256 (longer) mean replenishment times (Tarnita et al., 2015). In deterministic environments the identity  
257 of the winner was also deterministic and not altered by co-development (inset of Fig. 5c,d);  
258 however, co-development did alter the time-to-extinction of the loser (inset of Fig. 5e,f). On the  
259 contrary, in stochastic environments, for every pair of competing strains, there is a range of  
260 environments where the identity of the winner is uncertain and that range is drastically altered by  
261 co-development (Fig. 5c,d). As in deterministic environments, co-development also influenced the  
262 time-to-extinction of the loser (Fig. 5e,f).

263 To untangle the effects of co-development on diversity at different spatial scales, we discretized  
264 the environment into small-scale patches with identical replenishment conditions. Competition  
265 between pairs of strains occurred within each patch, and there was no dispersal between patches.  
266 Importantly, this setup allows us to investigate the effects of co-development on alpha (intra-patch)  
267 and beta (inter-patch) diversity, but it does not introduce any intrinsic spatial heterogeneity. As  
268 expected, within each patch, we found competitive exclusion. However, at the level of the  
269 environment, if the replenishment conditions are within the range where the identity of the winner  
270 is uncertain, there can be coexistence. Each of our predicted modes of co-development imparted a  
271 distinct biodiversity signature. Specifically, in case (i), the converging behaviors of the two strains  
272 led to much longer times to extinction, resulting in higher transient alpha diversity compared to  
273 the segregated model. However, this mode of co-development also narrowed the environmental  
274 range in which competition lead to non-deterministic exclusion, resulting in lower stationary beta  
275 diversity compared to the segregated model (Fig. 6a). Case (ii) yielded the opposite outcome for  
276 both alpha and beta diversity (Fig. 6b).

## 277 **Conclusion**

278 To conclude, here we showed natural variation and heritability in the aggregator-loner partitioning  
279 behavior of naturally co-occurring strains of *D. discoideum*. Strikingly, the seemingly asocial  
280 loners are not a separate, independently-determined subset of cells, but rather they arise  
281 dynamically from the collective process. Coupling experiments and theory, we revealed that the  
282 aggregator-loner partitioning behavior is governed by a stochastic cell-level decision-making  
283 process mediated by cell signaling and modulated by both the abiotic and the biotic context. These  
284 investigations of collective behavior revealed previously unknown stochastic aspects of *D.*  
285 *discoideum* development. Finally, we used a theoretical approach to explore the ecological  
286 consequences of these findings and showed that the co-development of different strains impacts  
287 diversity across multiple scales. These results, arising solely from interactions between ecology  
288 and development, recapitulate the biodiversity outcomes of classical eco-evolutionary interactions.  
289 Overall, our results highlight the necessity of an integrated approach to collective behaviors,  
290 including multicellularity: studying asocial life-history strategies revealed insights into collective  
291 behavior and development, and studying development revealed insights into ecological dynamics  
292 and parallels with well-studied eco-evolutionary processes.

293 Furthermore, our findings have potentially fundamental implications for the evolution of  
294 aggregative multicellularity and social behaviors. Many factors could undermine the integrity of  
295 social complexes, such as free-riding, whereby individuals reap the benefits of group living  
296 without paying the costs. In slime molds, free-riders—strains that never contribute to stalk  
297 formation in mixes—have been found both in the wild (Buss, 1982) and in the lab (Kuzdzal-Fick,  
298 Fox, Strassmann, & Queller, 2011). If under selection, the heritable loners, invulnerable to the  
299 threats to the multicellular stage but capable of re-achieving multicellularity via their offspring,

300 could constitute insurance against such threats and could therefore be critical to the evolution and  
301 persistence of aggregative multicellularity. This hypothesis is consistent with the handful of  
302 theoretical studies on cooperative behaviors that have considered social loners (Garcia, Doulier,  
303 & De Monte, 2015; Hauert, De Monte, Hofbauer, & Sigmund, 2002).

304  
305 Finally, beyond multicellularity and sociality, our results have potential implications for the  
306 broadly analogous loner behaviors identified across a variety of systems in which some form of  
307 coordination or synchronization is observed, from insects (Simpson et al., 1999) to vertebrates  
308 (Couzin & Krause, 2003; Hopcraft et al., 2015) to plants (Janzen, 1976). Our findings represent  
309 the first demonstration that loner behaviors can indeed exhibit natural variation and heritability—  
310 and that this can have significant ecological consequences—and, as such, they motivate a broader  
311 investigation into loner behaviors in other systems. While the mechanisms underlying the  
312 existence of loners are likely different across systems, the widespread existence of loners and the  
313 possibility that they could in fact be shaped by selection suggest an interesting conjecture: that, in  
314 general, imperfect synchronization may enable evolution to shape population-partitioning  
315 strategies in ways that could be instrumental for behavioral diversity and for the persistence of the  
316 collective stage, and thus for system-level robustness.

317

318

### 319 **Box 1**

320

321 In the spatially implicit limit ( $D \rightarrow \infty$ ,  $v$  finite) and in the limit of large initial population size  
322 ( $N_0 \rightarrow \infty$ ), the density of loners  $\rho_L$  can be calculated analytically, which reveals the interactions  
323 among model parameters (see SI Appendix). We find

324

$$325 \rho_L \propto \begin{cases} \kappa \left(1 - \frac{\lambda}{\tilde{v}}\right), & \text{if } \lambda < \tilde{v} \\ 0, & \text{otherwise} \end{cases}$$

326

327 where  $\kappa = \theta/\gamma$  is the ratio between the sensitivity threshold and the signaling rate, and  $\tilde{v}$  is the  
328 velocity rescaled by the mean distance traveled by cells before joining the aggregate. This reveals  
329 a phase separation determined by the relative speeds of the two transitions,  $P$ -to- $A$  and  $A$ -to- $M$   
330 (Fig. S4b): a lack of synchronization resulting in loners occurs only if the  $P$ -to- $A$  transition is  
331 slower than the  $A$ -to- $M$  transition.

332

---

## 333 **References**

- 334 Balázsi, G., Van Oudenaarden, A., & Collins, J. J. (2011). Cellular decision making and biological  
335 noise: From microbes to mammals. *Cell*, *144*(6), 910–925.  
336 <https://doi.org/10.1016/j.cell.2011.01.030>
- 337 Bodenschatz, E., Bae, A. J., & Prabhakara, K. H. (2017). The cooperation of the haves and the  
338 have-nots. *BioRxiv*, 234849. <https://doi.org/10.1101/234849>
- 339 Bonner, J. T. (2009). *The social amoebae: the biology of cellular slime molds*. Princeton University  
340 Press.
- 341 Brock, D. A., & Gomer, R. H. (1999). A cell-counting factor regulating structure size in  
342 *Dictyostelium*. *Genes and Development*, *13*(15), 1960–1969.



- 343 <https://doi.org/10.1101/gad.13.15.1960>
- 344 Buss, L. W. (1982). Somatic cell parasitism and the evolution of somatic tissue compatibility.  
345 *Proceedings of the National Academy of Sciences of the United States of America*,  
346 79(September), 5337–5341. <https://doi.org/10.1073/pnas.79.17.5337>
- 347 Buttery, N. J., Rozen, D. E., Wolf, J. B. B., & Thompson, C. R. L. (2009). Quantification of social  
348 behavior in *Dictyostelium discoideum* reveals complex fixed and facultative strategies.  
349 *Current Biology*, 19(16), 1373–1377. <https://doi.org/10.1016/j.cub.2009.06.058>
- 350 Clarke, M., & Gomer, R. H. (1995, December). PSF and CMF, autocrine factors that regulate gene  
351 expression during growth and early development of *Dictyostelium*. *Experientia*. Birkhäuser-  
352 Verlag. <https://doi.org/10.1007/BF01944730>
- 353 Cotter, D. A., & Raper, K. B. (1968). Factors affecting the rate of heat-induced spore germination  
354 in *Dictyostelium discoideum*. *Journal of Bacteriology*, 96(1), 86–92. Retrieved from  
355 <http://www.ncbi.nlm.nih.gov/pubmed/4874316>
- 356 Couzin, I. D., & Krause, J. (2003). Self-Organization and collective behavior in vertebrates. In  
357 *Advances in the Study of Behavior* (Vol. 32, pp. 1–75). [https://doi.org/10.1016/S0065-](https://doi.org/10.1016/S0065-3454(03)01001-5)  
358 3454(03)01001-5
- 359 D’Alessandro, J., Anjard, C., Mas, L., Aubry, L., Rieu, J.-P., & Rivière, C. (2018). Collective  
360 regulation of cell motility using an accurate density-sensing system. *Journal Royal Society*  
361 *Interface*, 15, 20180006. Retrieved from <http://dx.doi.org/10.1098/rsif.2018.0006>
- 362 Dallon, J. C., & Othmer, H. (1997). A discrete cell model with adaptive signalling for aggregation  
363 of *Dictyostelium discoideum*. *Philosophical Transactions of the Royal Society of London.*  
364 *Series B, Biological Sciences*, 352(1351), 391–417. <https://doi.org/10.1098/rstb.1997.0029>
- 365 Dubravcic, D. (2013). *Quantitative evolutionary analysis of the life cycle of social amoebae*.  
366 Université René Descartes - Paris V.
- 367 Dubravcic, D., van Baalen, M., & Nizak, C. (2014). An evolutionarily significant unicellular  
368 strategy in response to starvation stress in *Dictyostelium* social amoebae. *F1000Research*,  
369 3(133), 1–24. <https://doi.org/10.12688/f1000research.4218.1>
- 370 Dworkin, M., & Keller, K. H. (1977). Solubility and diffusion coefficient of adenosine 3’: 5’-  
371 monophosphate. *Journal of Biological Chemistry*, 252(3), 864–865.
- 372 Fey, P., Dodson, R. J., Basu, S., & Chisholm, R. L. (2013). One stop shop for everything  
373 *Dictyostelium*: DictyBase and the Dicty Stock Center in 2012. *Methods in Molecular Biology*,  
374 983, 59–92. [https://doi.org/10.1007/978-1-62703-302-2\\_4](https://doi.org/10.1007/978-1-62703-302-2_4)
- 375 Fey, P., Kowal, A. S., Gaudet, P., Pilcher, K. E., & Chisholm, R. L. (2007). Protocols for growth  
376 and development of *Dictyostelium discoideum*. *Nature Protocols*, 2(6), 1307–1316.  
377 <https://doi.org/10.1038/nprot.2007.178>
- 378 Fisher, P. R., Merkl, R., & Gerisch, G. (1989). Quantitative analysis of cell motility and  
379 chemotaxis in *Dictyostelium discoideum* by using an image processing system and a novel  
380 chemotaxis chamber providing stationary chemical gradients. *The Journal of Cell Biology*,  
381 108(3), 973–984. <https://doi.org/10.1083/jcb.108.3.973>
- 382 Francis, D., & Eisenberg, R. (1993). Genetic structure of a natural population of *Dictyostelium*  
383 *discoideum*, a cellular slime mould. *Molecular Ecology*, 2(6), 385–391.  
384 <https://doi.org/10.1111/j.1365-294X.1993.tb00031.x>
- 385 Garcia, T., Doulier, G., & De Monte, S. (2015). The evolution of adhesiveness as a social  
386 adaptation. *ELife*, 4, e08595. <https://doi.org/10.7554/eLife.08595>
- 387 Gomer, R. H., Yuen, I. S., & Firtel, R. A. (1991). A secreted 80x10(3)mr protein mediates sensing  
388 of cell-density and the onset of development in *Dictyostelium*. *Development*, 112(1), 269–

- 389 278.
- 390 Gregor, T., Fujimoto, K., Masaki, N., & Sawai, S. (2010). The onset of collective behavior in  
391 social amoebae. *Science*, 328(5981), 1021–1025. <https://doi.org/10.1126/science.1183415>
- 392 Hauert, C., De Monte, S., Hofbauer, J., & Sigmund, K. (2002). Volunteering as red queen  
393 mechanism for cooperation in public goods games. *Science*, 296(5570), 1129–1132.
- 394 Hopcraft, J. G. C., Holdo, R. M., Mwangomo, E., Mduma, S. A. R., Thirgood, S. J., Olf, H., &  
395 Sinclair, A. R. E. (2015). Why are wildebeest the most abundant herbivore in the Serengeti  
396 ecosystem? In F. J. Sinclair ARE, Metzger K, Mduma SAR (Ed.), *Serengeti IV: Sustaining*  
397 *Biodiversity in a Coupled Human-Natural System*. Chicago: The University of Chicago Press.
- 398 Jain, R., Yuen, I. S., Taphouse, C. R., & Gomer, R. H. (1992). A density-sensing factor controls  
399 development in *Dictyostelium*. *Genes and Development*, 6(3), 390–400.  
400 <https://doi.org/10.1101/gad.6.3.390>
- 401 Janzen, D. H. (1976). Why bamboos wait so long to flower. *Annual Review of Ecology and*  
402 *Systematics*, 7(1), 347–391. <https://doi.org/10.1146/annurev.es.07.110176.002023>
- 403 Johnson, E. M., Berk, D. A., Jain, R. K., & Deen, W. M. (1996). Hindered diffusion in agarose  
404 gels: test of effective medium model. *Biophysical Journal*, 70(2 D), 1017–1023.  
405 [https://doi.org/10.1016/S0006-3495\(96\)79645-5](https://doi.org/10.1016/S0006-3495(96)79645-5)
- 406 Kaiser, D., & Crosby, C. (1983). Cell movement and its coordination in swarms of *Myxococcus*  
407 *xanthus*. *Cell Motility*, 3(3), 227–245. <https://doi.org/10.1002/cm.970030304>
- 408 Katz, Y., Tunstrom, K., Ioannou, C. C., Huepe, C., & Couzin, I. D. (2011). Inferring the structure  
409 and dynamics of interactions in schooling fish. *Proceedings of the National Academy of*  
410 *Sciences*, 108(46), 18720–18725. <https://doi.org/10.1073/pnas.1107583108>
- 411 Keller, E. F., & Segel, L. a. (1970). Initiation of slime mold aggregation viewed as an instability.  
412 *Journal of Theoretical Biology*, 26(3), 399–415. [https://doi.org/10.1016/0022-](https://doi.org/10.1016/0022-5193(70)90092-5)  
413 [5193\(70\)90092-5](https://doi.org/10.1016/0022-5193(70)90092-5)
- 414 Kessler, D. A., & Levine, H. (1993). Pattern formation in *Dictyostelium* via the dynamics of  
415 cooperative biological entities. *Physical Review E*, 48(6), 4801–4804.  
416 <https://doi.org/10.1103/PhysRevE.48.4801>
- 417 Kolbinger, A., Gao, T., Brock, D., Ammann, R., Kisters, A., Kellermann, J., ... Wetterauer, B.  
418 (2005). A cysteine-rich extracellular protein containing a PA14 domain mediates quorum  
419 sensing in *Dictyostelium discoideum*. *Eukaryotic Cell*, 4(6), 991–998.  
420 <https://doi.org/10.1128/EC.4.6.991-998.2005>
- 421 Kuzdzal-Fick, J. J., Fox, S. A., Strassmann, J. E., & Queller, D. C. (2011). High relatedness is  
422 necessary and sufficient to maintain multicellularity in *Dictyostelium*. *Science*, 334, 1548–  
423 1551. <https://doi.org/10.1126/science.1213272>
- 424 Loomis, W. F. (2012). *The development of Dictyostelium discoideum*. Elsevier.
- 425 Loomis, W. F. (2014). Cell signaling during development of *Dictyostelium*. *Developmental*  
426 *Biology*, 391(1), 1–16. <https://doi.org/10.1016/j.ydbio.2014.04.001>
- 427 Martínez-García, R., & Tarnita, C. E. (2016). Lack of ecological and life history context can create  
428 the illusion of social interactions in *Dictyostelium discoideum*. *PLoS Computational Biology*,  
429 12(12), e1005246.
- 430 Martínez-García, R., & Tarnita, C. E. (2017). Seasonality can induce coexistence of multiple bet-  
431 hedging strategies in *Dictyostelium discoideum* via storage effect. *Journal of Theoretical*  
432 *Biology*, 426, 104–116.
- 433 Palsson, E., & Othmer, H. (2000). A model for individual and collective cell movement in  
434 *Dictyostelium discoideum*. *Proceedings of the National Academy of Sciences of the United*

- 435 *States of America*, 97(19), 10448–10453.
- 436 Peleg, O., Peters, J. M., Salcedo, M. K., & Mahadevan, L. (2018). Collective mechanical  
437 adaptation of honeybee swarms. *Nature Physics*, 14(12), 1193–1198.  
438 <https://doi.org/10.1038/s41567-018-0262-1>
- 439 Pluen, A., Netti, P. A., Jain, R. K., & Berk, D. A. (1999). Diffusion of macromolecules in agarose  
440 gels: Comparison of linear and globular configurations. *Biophysical Journal*, 77(1), 542–552.  
441 [https://doi.org/10.1016/S0006-3495\(99\)76911-0](https://doi.org/10.1016/S0006-3495(99)76911-0)
- 442 Sawai, S., Thomason, P. A., & Cox, E. C. (2005). An autoregulatory circuit for long-range self-  
443 organization in *Dictyostelium* cell populations. *Nature*, 433(7023), 323–326.  
444 <https://doi.org/10.1038/nature03228>
- 445 Simpson, S. J., McCaffery, A. R., & Hägele, B. F. (1999). A behavioural analysis of phase change  
446 in the desert locust. *Biological Reviews*, 74(4), 461–480. <https://doi.org/10.1111/j.1469-185X.1999.tb00038.x>
- 448 Song, L., Nadkarni, S. M., Bödeker, H. U., Beta, C., Bae, A., Franck, C., ... Bodenschatz, E.  
449 (2006). *Dictyostelium discoideum* chemotaxis: threshold for directed motion. *European*  
450 *Journal of Cell Biology*, 85(9–10), 981–989. <https://doi.org/10.1016/j.ejcb.2006.01.012>
- 451 Stenhouse, F. O., & Williams, K. L. (1977). Patterning in *Dictyostelium discoideum*: The  
452 proportions of the three differentiated cell types (spore, stalk, and basal disk) in the fruiting  
453 body. *Developmental Biology*, 59(2), 140–152. [https://doi.org/10.1016/0012-1606\(77\)90249-4](https://doi.org/10.1016/0012-1606(77)90249-4)
- 455 Strassmann, J. E., & Queller, D. C. (2011). Evolution of cooperation and control of cheating in a  
456 social microbe. *Proceedings of the National Academy of Sciences*, 108, 10855–10862.  
457 <https://doi.org/10.1073/pnas.1102451108>
- 458 Strassmann, J. E., Zhu, Y., & Queller, D. C. (2000). Altruism and social cheating in the social  
459 amoeba *Dictyostelium discoideum*. *Nature*, 408(6815), 965–967.  
460 <https://doi.org/10.1038/35050087>
- 461 Tarnita, C. E., Washburne, A., Martínez-García, R., Sgro, A. E., & Levin, S. A. (2015). Fitness  
462 tradeoffs between spores and nonaggregating cells can explain the coexistence of diverse  
463 genotypes in cellular slime molds. *Proceedings of the National Academy of Sciences*,  
464 201424242.
- 465 Wolf, J. B. B., Howie, J. A. A., Parkinson, K., Gruenheit, N., Melo, D., Rozen, D., & Thompson,  
466 C. R. L. (2015). Fitness trade-off result in the illusion of social success. *Current Biology*,  
467 25(8), 1086–1090. <https://doi.org/10.1016/j.cub.2015.02.061>
- 468 Yuen, I. S., & Gomer, R. H. (1994). Cell density-sensing in *Dictyostelium* by means of the  
469 accumulation rate, diffusion, coefficient and activity threshold of a protein secreted by starved  
470 cells. *Journal of Theoretical Biology*, 167, 273–282.

471  
472 **Acknowledgments:** We thank J. Bonner, E. Cox, D. Morris, D. Liberles, R. Pringle, M. Skoge,  
473 and K. Vetsigian for useful discussions. This work was supported by the Gordon and Betty Moore  
474 Foundation through grant GBMF2550.06 (RMG), NIH R01 GM098407 (TG), NRSA F32  
475 GM103062 (AES), and the Alfred P Sloan Foundation (CET). AES was partially supported by a  
476 Burroughs Wellcome Fund Career Award at the Scientific Interface.

477 **Author contributions:** All authors contributed to the conception of the study. FWR, AES and TG  
478 designed the experiments with input from RMG and CET. FWR performed the experiments with  
479 initial guidance from AES. FWR analyzed the experiments. RMG developed the theoretical

480 models with input from FWR and CET. RMG performed and analyzed the simulations. RMG and  
481 CET produced analytical calculations. CET drafted the paper, and all authors provided comments.

482

483 **Competing interests:** Authors declare no competing interests.

484

485 **Data and materials availability:** The data sets generated and analysed during the current study  
486 are available in the Dryad repository at <http://dx.doi.org/XXX>. The computer code is available  
487 from the corresponding authors upon request.

## 488 **Materials and Methods**

### 489 **Experiments. *D. discoideum* growth and plating.**

490 NC28.1, NC34.1, and NC85.2 —three clonal lineages of *D. discoideum* originally isolated from  
491 Little Butt's Gap, North Carolina (Francis & Eisenberg, 1993) —were obtained from dictyBase  
492 (Fey, Dodson, Basu, & Chisholm, 2013) and grown on *Klebsiella aerogenes* lawns prepared on  
493 SM agar plates (Fey, Kowal, Gaudet, Pilcher, & Chisholm, 2007). After the *D. discoideum* cells  
494 aggregated and formed fruiting bodies, spores were harvested and used to inoculate 3mL of a *K.*  
495 *aerogenes* suspension in SorMC buffer (OD600 of 8). The suspension was kept in a shaker for 24  
496 hours and then used to inoculate 12mL of the *K. aerogenes* suspension. During growth, *D.*  
497 *discoideum* cell densities were kept below  $3 \times 10^6$  cells/mL. After 24 more hours, in preparation  
498 for the synchronous starvation of the cells, the suspension was cooled to 4°C for five minutes. The  
499 suspension was then centrifuged at 700 g for three minutes at 4°C and the remaining pellet was  
500 resuspended in 10mL of SorMC buffer. The spinning and resuspension cycles were repeated three  
501 times to wash away any remaining *K. aerogenes* cells (Fey et al., 2013). For the final resuspension  
502 the cell concentration was  $10^7$  cells/mL.

503 From each stock suspension, a dilution series in SorMC buffer (80%,70%,...,20%) was obtained.  
504 In addition, a 5% dilution was prepared from each stock suspension. The 5% dilutions were below  
505 the critical aggregation density, and they were used to estimate the total amount of cells in the  
506 other samples coming from the same stock suspension. Cells were plated on non-nutrient agar gels  
507 (2%, 3% and 4% concentrations) cast in 1.5mm acrylamide gel casts (Bio-Rad). Each of the diluted  
508 and undiluted cell suspensions was applied to the agar substrates as a 10 $\mu$ L droplet.

509 The samples were then left to develop in a moist dark chamber at 21°C until the streaming phase  
510 of aggregation was over and most of the aggregates were already at the slug stage (~14 hours).  
511 Development was then halted by lowering the chamber temperature to 4°C. Even though the 5%  
512 diluted suspension samples never aggregated, they were also left in the chamber for the full length  
513 of the experiment. This circumvents the problem of residual divisions post resource removal. The  
514 diluted and non-aggregated samples were then used to estimate the total number of cells in the  
515 undiluted aggregated samples.

516 In order to check for the consistency of the dilution procedure, 5%, 10% and 15% dilutions of  
517 NC34.1 strain stock solutions were also prepared and plated on 3% agar substrates. A linear  
518 Gaussian model with intercept 0 was fit to the cell counts of different dilutions of the same  
519 suspension. The standard deviation of this model was taken to be the error intrinsic to the dilution  
520 process (Figure S2a).

521 For mixed strain experiments, strains NC28.1 and NC85.2 were used. They were grown, washed  
522 and resuspended separately. Then, without diluting the suspensions, different mixes were made  
523 (25%,50% and 75% of the initial strain NC28.1 suspension). A 5% dilution was made for each of

524 the two pure strain suspensions. Each of the mixes, pure strain suspensions, and dilutions were  
525 plated as four replicates for each experiment. These 5% dilutions were used to estimate the  
526 proportions of cells of each strain in each of the experiments. 3% agar substrates were used.

527 For the resource depletion experiments, cells of strains NC28.1 and NC85.2 were grown in  
528 bacterial suspensions until they reached either a density of  $1 \times 10^6$  cells per mL (conditions under  
529 which bacteria were still plentiful), or for 10 hours longer than that (conditions under which  
530 bacteria have just been depleted). In both treatments, cells were then washed from bacterial  
531 leftovers and let aggregate on 3% agar gels

### 532 **Imaging samples and counting cells.**

533 An ultrasonic atomizer (from CVS) was used to uniformly apply a 0.5mm thick layer of warm  
534 imaging solution (SorMC containing 0.3 mol/L of dextrose and 0.05% agar) to the samples. After  
535 resting for 10 minutes at room temperature cells assume a spherical shape and detach from  
536 neighboring cells. Samples were then photographed with a Canon t5i DSLR camera at a Nikon Ti-  
537 Eclipse inverted microscope equipped with a 10X objective. The imaged area, a square of side  
538 1.5cm, was large enough to encompass the initial cell plated area plus a buffer zone that ensures  
539 that all cells were imaged. Custom software using the OpenCV package for Python was then used  
540 to count the cells that did not join aggregation centers.

541 The error of automatic cell counts was estimated by taking samples of images of cells in various  
542 densities, manually and automatically counting them and fitting a linear Gaussian model with slope  
543 1 and intercept 0 (Figure S2b). The standard deviation of the fitted model was taken as the  
544 automatic counting error.

545 Total plated cell counts in each sample were estimated by counting the non-aggregated 5% dilution  
546 of the corresponding stock suspension and multiplying by the dilution factor of that particular  
547 sample. We do not assess differential loner viability, which might effectively increase the  
548 difference in loner allocation between strains.

### 549 **Spatial pattern analysis.**

550 For each cell in each experiment, the local cell density was calculated in a neighborhood with a  
551 radius of 10% of the total experimental radius. Cells that weren't within the center of the  
552 experimental area (defined by a radius of 60% of the total experimental radius) weren't included  
553 in the analysis, to avoid border effects. For each strain and agar concentration, neighborhood  
554 densities of cells of all experiments were pooled together in a probability distribution. The results  
555 were qualitatively similar for other neighborhood radii, but because the imaging treatment might  
556 shift a bit the position of the cells, we chose a radius that is considerably larger than this effect

557 **Statistical analyses of mixed strain experiments.** Given a constant initial cell density, we intend  
558 to test if the loner-aggregator partitioning process of a strain is influenced by the genotypic identity  
559 of its neighbors. We let  $P_i$  be the proportion of cells of strain  $i$  that stay as loners. We determined  
560 that this depends on  $\rho_0$ , the initial density of the population, such that the density of loners in a  
561 clonal population of strain  $i$  at density  $\rho_0$  is  $\rho_L^i = \rho_0 P_i(\rho_0)$ . Here we investigate whether in mixes  
562  $P_i$  is also a function of the fraction  $\Pi_j = 1 - \Pi_i$  of cells of co-occurring strain  $j$  (where  $\Pi_i$  is the  
563 fraction of cells of strain  $i$ ). The total loner density in the mix can be expressed as  $\rho_L^{\text{mix}} =$   
564  $\Pi_i \rho_0 P_i(\rho_0, \Pi_j) + \Pi_j \rho_0 P_j(\rho_0, \Pi_i)$ , where  $\rho_0$  is the initial total density of plated cells and  $\Pi_i$  is the  
565 fraction of strain  $i$  in the initial mix.

566 *Null hypothesis.* If  $P_i$  is not a function of  $\Pi_j$ , then  $\rho_L^{\text{mix}} = \Pi_i \rho_L^i + \Pi_j \rho_L^j$ , which is the linear  
 567 combination of the expected loner counts for each of the strains composing the mix (null  
 568 hypothesis).

569 *Statistical test 1. Piecewise linear regression* (Fig. 3). We measure departures from this linear  
 570 expectation by fitting a piecewise linear regression to the data. The p-value shows how often data  
 571 drawn from the global linear fit generates piecewise linear regressions with more extreme  
 572 inclinations.

573 *Statistical test 2. Maximum likelihood* (Fig. S6a-c). We also use a maximum likelihood based  
 574 model selection to test for non-linearity. We let  $\rho_L^{\text{mix}} = \rho_L^i + f(\Pi_j)(\rho_L^j - \rho_L^i) + \epsilon$  where  $f$  is the  
 575 function of interest and  $\epsilon$  is a normally distributed noise term. If  $f(\Pi_j) = \Pi_j$  then we recover the  
 576 null hypothesis. In addition, for  $f$  we explore three other functional forms: sigmoidal, convex and  
 577 concave, which are given by a shape parameter  $a$  as follows:

578

579 
$$f(\Pi_j) = \frac{a\Pi_j}{1+(a-1)\Pi_j} \quad - \quad \text{convex if } 0 < a < 1; \text{ concave if } a > 1$$

580 
$$f(\Pi_j) = \frac{I_a(\Pi_j) - I_a(0)}{I_a(1) - I_a(0)} \quad \text{where } I_a(x) = \frac{1}{1+e^{-a(x-0.5)}} \quad - \quad \text{sigmoidal}$$

581

582 We also considered three forms for the noise term: a homoscedastic structure, a constant  
 583 coefficient of variation and a heteroscedastic structure, given respectively by

584

585 
$$\epsilon \sim N(0, c)$$

586 
$$\epsilon \sim N\left(0, \frac{c}{\rho_L^i + f(\Pi_j)(\rho_L^j - \rho_L^i)}\right)$$

587 
$$\epsilon \sim N(0, c_i \Pi_i + c_j \Pi_j)$$

588

589 We computed the  $\Delta\text{AIC}$ , the difference in AIC (Akaike Information Criterion) between a given  
 590 model and the best model in the candidate set. Credible intervals were built for the shape parameter  
 591  $a$  using Log-likelihood ratios.

592 *Statistical test 3. Bootstrapping analysis* (Fig. S6d,e). For each of the five strain mix  
 593 proportions, empirical distributions were bootstrapped and 50.000 data sets were constructed. For  
 594 each resampled data set, a linear regression was performed using only the pure strain experiments  
 595 and another linear regression was performed using only the mixed strain experiments. The  
 596 difference between these inclinations is a measure of the non-linearity of the data set.

597

598 **Theory. Population-partitioning model.** We implement the spatially-explicit developmental  
 599 model on a square system of lateral length  $\ell = 0.2\text{cm}$  that represents a single aggregation territory.  
 600 Time is discretized in short intervals of length  $dt = 0.01\text{h}$ ; our results are independent of the value  
 601 of  $dt$ . Within each time step, the internal state and the position of every cell can be updated. Since  
 602 reproduction and death are negligible over the temporal scales of aggregation, the total population  
 603 size is conserved during each run of the model.

604

605 Consistent with the experimental setup, we initialize the simulations immediately after resource  
 606 exhaustion with  $N_0$  discrete and randomly distributed cells, assumed to be in a pre-aggregating  
 607 state,  $P$ . Thus the initial density of cells is  $\rho_0 = N_0/\ell^2$ .  $P$ -cells do not move; they emit signal at a  
 constant strain-specific rate  $\gamma$  and sense it with a strain-specific sensitivity threshold  $\theta$ . The

608 assumption that *P*-cells do not move is consistent with experimental results showing a reduced  
 609 movement of vegetative cells at high density (D’Alessandro et al., 2018). Within each time step  
 610  $dt$ , *P*-cells that sense a local signal density higher than the strain-specific sensitivity threshold  $\theta$ ,  
 611 may become aggregating *A*-cells with a strain-specific probability  $\lambda dt$ . A detailed description of  
 612 how signal density is obtained at the position of each cell is below.

613 *A*-cells move in the direction of the aggregation center, which is exogenously imposed in the center  
 614 of the system, making a straight displacement of length  $vdt$  in every time step. This movement  
 615 pattern simplifies the complexities of *D. discoideum* motion during aggregation, such as the  
 616 tortuosity in single-cell trajectories caused by imperfect chemotaxis (Fisher, Merkl, & Gerisch,  
 617 1989). However, the net effect of these ingredients is to increase the time required to reach the  
 618 aggregation center, which can be incorporated in the model by changing the value of cell velocity.  
 619 *A*-cells stop sensing signal but they continue to emit it at the same strain-specific rate,  $\gamma$ . When *A*-  
 620 cells cross the location of the aggregation center (center of the system) in one of their  
 621 displacements, they adhere to the mound and become multicellular, *M*-cells. *M*-cells do not move  
 622 and they neither emit nor sense signal. Both the *A*-to-*P* and the *P*-to-*M* transition between cell  
 623 states are irreversible.

624 Simulations are allowed to run until the time between two consecutive cell arrivals to the mound  
 625 is larger than a fixed value  $t_{arr} = 1$  hour. Alternatively, we explore the effect of a fixed aggregation  
 626 time by finalizing the simulations after an exogenously imposed time (results not shown). Neither  
 627 qualitative nor quantitative differences were observed between these two ending conditions,  
 628 provided that both of these times were sufficiently large. We compute the final density of loners  
 629 by counting the number of cells that do not belong to the mound at the end of each model  
 630 realization and dividing it by the area of the system,  $\ell^2$ . Due to the low skewness of the distribution  
 631 of loner densities obtained from independent realizations, we use the mean loner density, which is  
 632 obtained by averaging over 100 realizations. A summary of the model parameterization is provided  
 633 in Table S1.

634 *Computation of signal density.* Signal is released by both *A*- and *P*-cells, but it is sensed only by  
 635 *P*-cells. The signal density,  $\sigma$ , at time  $t$  at the position  $\mathbf{r}$  of a focal *P*-cell is

$$\sigma(\mathbf{r}, t) = \sum_{\mathbf{r}' \neq \mathbf{r}} \sigma_{\mathbf{r}'}(|\mathbf{r} - \mathbf{r}'(t)|) \quad (1)$$

636 where the index of the sum runs over the locations of all other *A*- and *P*-cells in the system,  
 637  $|\mathbf{r} - \mathbf{r}'(t)|$  is the distance between the focal cell and these other cells, and  $\sigma_{\mathbf{r}'}$  gives the individual  
 638 contribution of a cell at location  $\mathbf{r}'$  to the total signal density. Since *P*-cells do not move,  $\mathbf{r}$  does  
 639 not depend on  $t$ ; similarly,  $\mathbf{r}'(t)$  is either constant (if it is the position of another *P*-cell) or not (if  
 640 it is the position of an *A*-cell). Our assumptions that signal is continuously released by each cell at  
 641 a strain-specific rate  $\gamma$ , diffuses in the system with diffusion constant  $D$  and spontaneously decays  
 642 at rate  $\eta$ , lead to a stationary profile in which signal density decreases with the distance from the  
 643 emitter (see SI Appendix for a detailed calculation of this profile

$$\sigma_{\mathbf{r}'}(|\mathbf{r} - \mathbf{r}'(t)|) = \frac{\gamma}{2\pi D} K_0 \left( \sqrt{\frac{\eta}{D}} |\mathbf{r} - \mathbf{r}'(t)| \right). \quad (2)$$

644  $K_0$  is the zero-order modified Bessel function of the second kind. Since in the experiments  
 645 aggregation occurs simultaneously on several adjacent aggregation territories, signals may diffuse

646 from one territory to another. To allow for this possibility in the model, the distances between the  
647 sensing focal  $P$ -cell and each of the emitters are measured using periodic boundary conditions.

### 648 **Competition model.**

649 This model consists of a sequence of growth-starvation periods with the population partitioning  
650 between loners and aggregators occurring at the onset of starvation. The expected length of the  
651 starvation periods (i.e., mean starvation time) defines the environmental conditions. We discretize  
652 each environment into  $\# = 10^4$  isolated patches (no cell dispersal between them) of area 1 and  
653 identical environmental conditions. The model architecture broadly follows (Martínez-García &  
654 Tarnita, 2016) but the population partitioning between loners and aggregators is modified to  
655 incorporate the behavior produced by the developmental model described above. We assume that  
656 the loner-aggregator partitioning curve is constant for all starvation events. Therefore, we do not  
657 consider mutation or horizontal gene transfer, which could alter strains' aggregation behavior.

658 *Growth.* During growth, free-living amoebae of two different strains compete for a shared resource  
659 within each patch. The initial frequency of each strain in the mix is drawn from a standard log-  
660 normal distribution, and the total initial population size  $X_0$  is normalized to the size of the resource  
661 pulse,  $R_0$ . The size of the resource pulse is fixed and large to guarantee that the population of cells  
662 in the patch is also large and that its fluctuations do not affect the aggregator-loner partitioning  
663 (i.e., aggregation occurs for population sizes that lie in the region in which loner density plateaus  
664 in Fig. S4). Mathematically, the growth dynamics is given by a Monod-like equation:

$$\dot{X}_i = \frac{cR}{R + R_{1/2}} X_i \quad (i = 1,2) \quad (3a) \quad \dot{R} = \frac{-cR}{R + R_{1/2}} \sum_{i=1}^2 X_i, \quad (3b)$$

665 where the dot indicates the time derivative,  $X_i$  is the population size for strain  $i$ ,  $R$  is the amount of  
666 resources, and  $R_{1/2}$  is the abundance of resources at which the growth rate is half of its maximum  
667  $c$ . Here, for simplicity, we assumed that both strains have the same maximum growth rate, although  
668 relaxing this assumption constitutes an important expansion towards a more complete  
669 understanding of life history traits and tradeoffs in slime molds (Martínez-García & Tarnita, 2016,  
670 2017; J.B.B. Wolf et al., 2015). The growth phase finishes when resources are below a starvation  
671 threshold ( $R^* = 1$ ) that is exogenously imposed, since  $R$  only tends to zero asymptotically in Eq.  
672 (3b).

673 *Population partitioning.* Since cell death is negligible over the temporal scales of aggregation, we  
674 assumed that the aggregator-loner partitioning occurs instantaneously upon resource exhaustion.  
675 We explored two different scenarios:

676 (a) Well-mixed development. Each patch is occupied by a homogenous mix of the two strains  
677 (Figure S8). Upon resource exhaustion, the density of loners left behind by each of the two  
678 strains is determined from the pair-specific co-developmental curve obtained via simulations  
679 of co-development using the spatially-explicit developmental model above (Fig. S7a,c).  
680 Whenever the composition of the mix at the end of a growth period does not coincide with  
681 any of the proportions sampled with co-developmental simulations, we estimate the density  
682 of loners of each strain with a linear interpolation between the two closest points to the  
683 desired proportion. Finally, since both strains are homogeneously distributed across the  
684 whole patch of area 1, the number of loners of each strain  $i$ ,  $X_i^L$  (which is the variable of  
685 interest for our model), is identical to loner density. We obtain the number of aggregated



686 cells of each strain as the difference between that strain's population size upon resource  
687 exhaustion (immediately before the population partitioning) and its number of loners.

688 (b) Segregated development. Each patch is occupied by the two strains but they do not mix; we  
689 therefore assume that they occupy a fraction of the patch area equal to that strain's proportion  
690 (Fig. S8). Upon resource exhaustion, the density of loners left behind by each of the two  
691 strains is determined from simulations of the developmental model above under clonal  
692 conditions. To obtain the number of loners, we multiply the density by the fraction of the  
693 patch (of area 1) occupied by that strain. We then obtain the number of aggregated cells as  
694 in the well-mixed scenario.

695 After the population partitioning occurs, based on experimental measures that consistently find an  
696 80:20 spore:stalk ratio within *D. discoideum* fruiting bodies formed under identical conditions  
697 (Stenhouse & Williams, 1977), we multiply the number of aggregated cells of each strain  $i$  by the  
698 same constant factor  $s = 0.8$  that reflects the effect of spore-stalk cell differentiation. This operation  
699 yields the number of reproductive spores,  $X_i^{SP}$ .

700 *Starvation.* The population partitioning is followed by a starvation period of length  $T_{st}$ , in which  
701 both aggregated and non-aggregated cells die, but at different rates. Spores die at a constant and  
702 low rate  $\delta$ , whereas loners have a survival probability,  $S$ , that decays with time and reaches zero at  
703 a maximum survival time  $T_{sur}$ . Analogous with (Martínez-García & Tarnita, 2017), we fit this  
704 maximum survival time as well as the functional shape of the survivorship curve using  
705 experimental data (Dubravcic, 2013) to obtain

$$706 \quad S(t) = \frac{e^{-(\mu t)^\zeta} - e^{-(\mu T_{sur})^\zeta}}{1 - e^{-(\mu T_{sur})^\zeta}}, \quad (4)$$

707 where  $\mu$  is the rate of decrease of the survival probability and  $\zeta$  is a parameter that modulates the  
708 decay of  $S$  with time. At the end of the starvation phase, we obtain the populations of surviving  
709 loners and spores of each strain  $i$  as

$$710 \quad X_i^L(t + T_{st}) = X_i^L(t)S(T_{st}) \quad (5a) \quad X_i^{SP}(t + T_{st}) = X_i^{SP}(t)e^{-\delta T_{st}}. \quad (5b)$$

711  
712 The lengths of the starvation periods  $T_{st}$  are either constant (deterministic environments, in which  
713 the length of each starvation period coincides with its mean value) or drawn from an exponential  
714 distribution with a mean  $\bar{T}_{st}$  that gives the expected length of the starvation periods. We label  
715 deterministic environments using the length of their starvation periods  $T_{st}$  and stochastic  
716 environments using their expected value  $\bar{T}_{st}$ .  $\bar{T}_{st}$  (or  $T_{st}$  in deterministic environments) is a  
717 measure for the environmental quality. Lower values of  $\bar{T}_{st}$  represent better environments in which  
718 pulses of resources arrive more frequently on average; larger values of  $\bar{T}_{st}$  represent worse  
719 environments in which resources recover less frequently. Each starvation phase ends with the  
720 arrival of the next resource pulse of size  $R_0$ . We assume that all loners have the same viability  
721 regardless of strain (i.e. that different strains do not have differential loner mortality); therefore,  
722 upon resource replenishment, all surviving loner cells start reproducing immediately, following  
723 Eqs. (3). Spores take an additional time  $T_{ger}$  to germinate (Cotter & Raper, 1968), during which  
724 they continue to die at rate  $\delta$ . At the end of the germination time, not all spores become reproducing  
725 cells; spores have a probability  $\omega$  of germinating successfully (Dubravcic et al., 2014). Therefore,  
726

727 we multiply the total number of spores by a constant factor  $\omega$  to obtain the fraction of the  
728 population of spores that become viable cells and start reproducing according to Eqs. (3).

729 We repeat this sequence of growth-starvation cycles until one of the strains becomes extinct. We  
730 then record the winning strain for each patch and the time-to-extinction for the loser (proxy for  
731 transient alpha-diversity). Once we have obtained the winner in each patch, we calculate the  
732 variability in the winner across different patches,  $\Phi$  (proxy for stationary beta-diversity), as

$$\Phi = \frac{\# - |\#_w - \#_b|}{\#}, \quad (6)$$

733 where  $\# = 10^4$  is the total number of patches, and  $\#_w$  and  $\#_b$  are the number of patches dominated  
734 by the worse, respectively the better aggregator in the stationary state. From Eq. (6), it follows that  
735  $\Phi$  varies between 0 and 1 ( $\Phi = 1$  when  $\#_w = \#_b$  and  $\Phi = 0$  when  $\#_w = \#$  or  $\#_b = \#$ ). Since the  
736 extinction times and the noise in the extinction times and  $\Phi$  vary depending on the pair of strains  
737 and the environmental conditions, mean values are taken over a varying number of independent  
738 realizations of the model to optimize computational efficiency. A summary of the model  
739 parameterization is provided in Table S1.

740

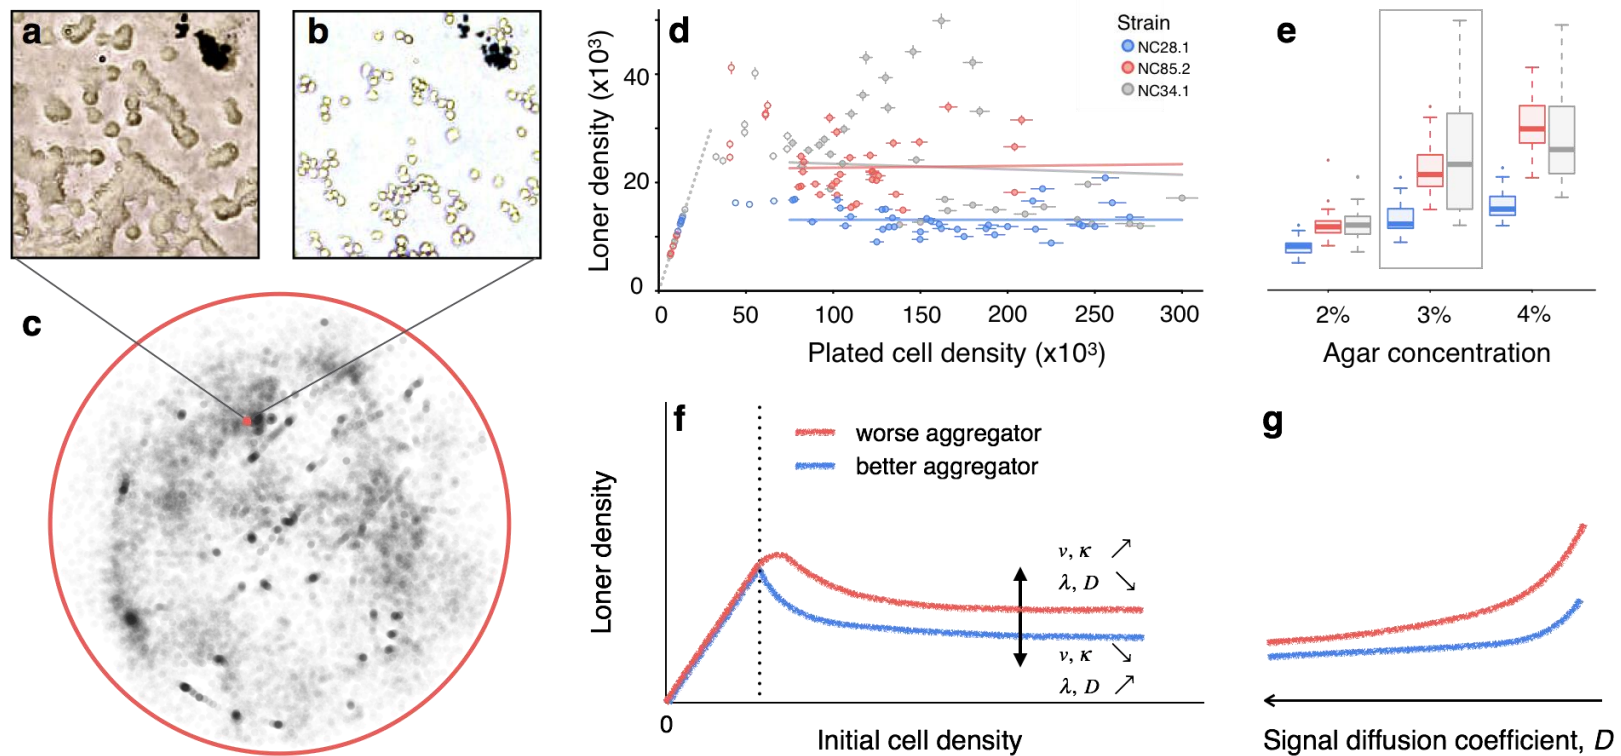

**Figure 1. Loners are a heritable component of *D. discoideum* fitness.** **a, b**, After aggregation, loner cells are hard to individualize (**a**), but become clearly distinguishable after processing (**b**). **c**, Map of the position of each loner cell in an experiment (NC85.2 developing in 3% agar). Red square marks region shown in (**a,b**). **d**, Loner densities of three strains as a function of initial plated density in 3% agar. Error bars, independent estimates of counting error (see Methods). Lines correspond to linear regressions using only high-initial-density data points (filled circles,  $>75.000$  cells/cm<sup>2</sup>). **e**, Loner densities from experiments with high initial cell density as a function of substrate agar concentration (y-axis same as in **d**). Boxes, inter-quartile ranges; horizontal lines, medians; whiskers,  $1.5\times$  inter-quartile range from the median; points, outliers. Strain NC28.1 always left fewer loners (*t*-test,  $p<0.001$ ). Values inside frame correspond to data used in (**d**). **f, g** Schematic of model results showing loner densities as a function of initial cell density (**f**) and signal diffusion coefficient (**g**). The y-axis in (**g**) is the same as in (**f**).

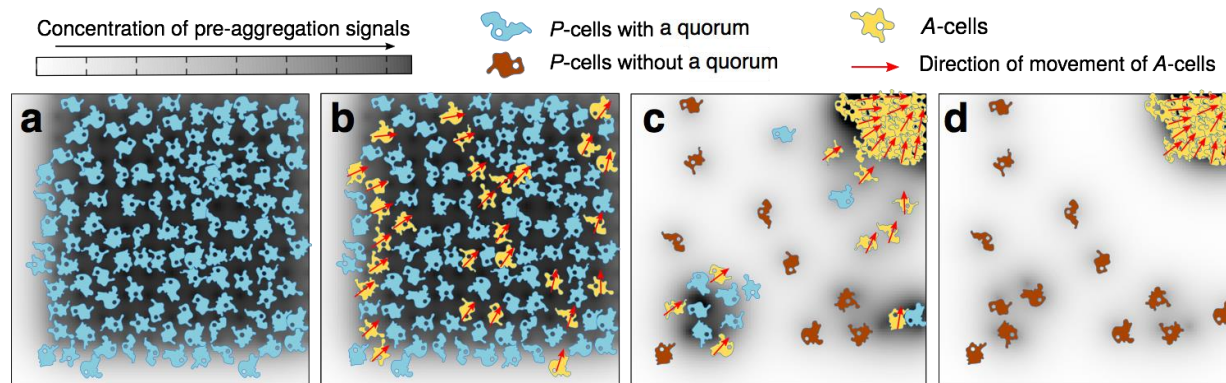

**Figure 2. Developmental model schematic.** **a**, At high initial densities, all *P*-cells have a quorum to initiate aggregation. **b**, With a strain-specific probability, some *P*-cells transition into *A*-cells. **c**, As *A*-cells aggregate, some of the *P*-cells that did not transition into *A*-cells are left without a quorum. These are the loners. **d**, At the end of development, *P*-cells far from the aggregate location are more likely to have been left without a quorum and to stay as loners.

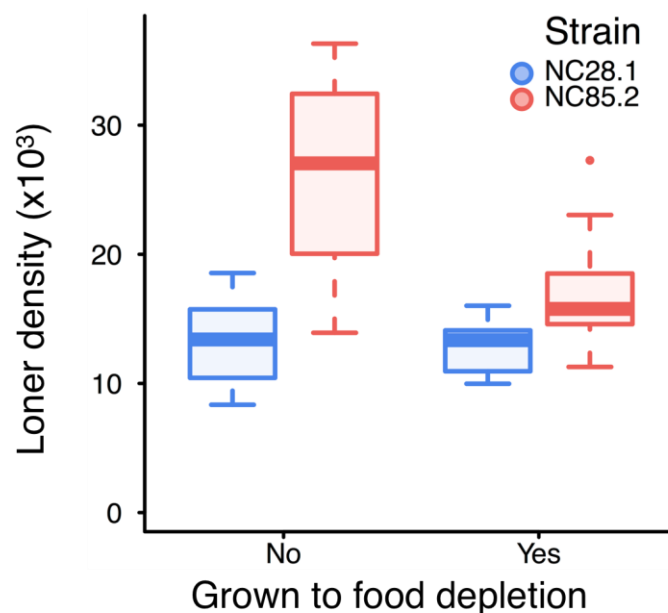

**Figure 3. Well-mixed signaling changes loner behavior.** Allowing cells to exhaust their resources in suspension does not significantly change the behavior of the better aggregator (strain NC28.1) ( $p = 0.7$ ), but it reduces the mean and variance of the number of loners of the worse aggregator (strain NC85.2) ( $p = 0.0006$ ). Boxes, inter-quartile ranges; horizontal lines, medians; whiskers,  $1.5 \times$  inter-quartile range from the median; points, outliers.

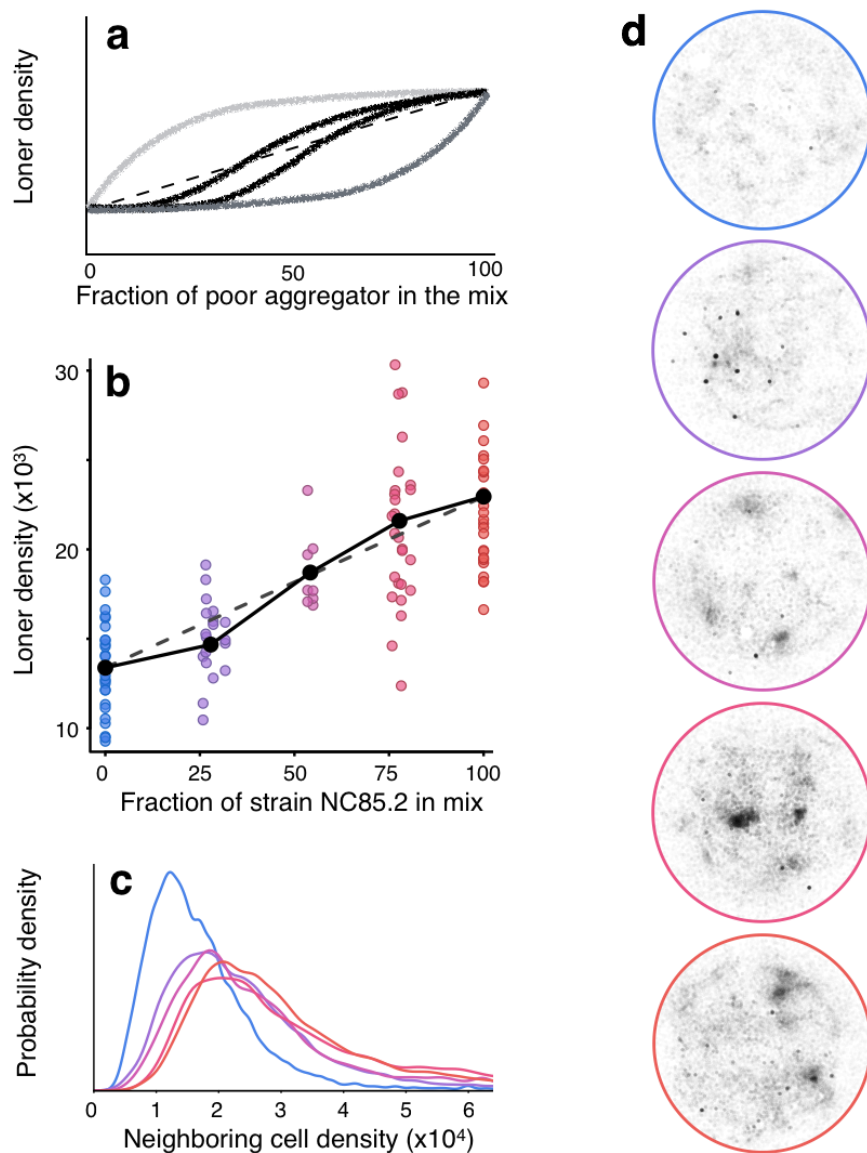

**Figure 4. Co-occurring strains interact during development.** **a**, Schematic of the range of theoretically predicted loner densities at different mix proportions of two co-occurring strains (thick curves). Dashed line, expected loner densities if cells commit to aggregation independent of the identity of their neighbors. **b**, Experimentally observed loner densities for different mix proportions of a better (NC28.1, blue) and a worse (NC85.2, red) aggregating strain in 3% agar. Black points, mean loner densities for each of the five proportions. Dashed line, same as in (a). Solid lines, piecewise linear regressions, which deviate significantly from the linear fit ( $p=0.019$ ; see Methods). **c**, Experimentally observed spatial patterns of each mix proportion are characterized by the local cell density around each cell (see Methods). Narrower distributions (NC28.1, blue curve) correspond to more homogeneously distributed loners. Broader distributions (NC85.2, red curve) correspond to more clumped loners. **d**, Experimentally obtained loner position maps are shown for each of the mixed proportions. Colors in (c,d) correspond to colors in (b).

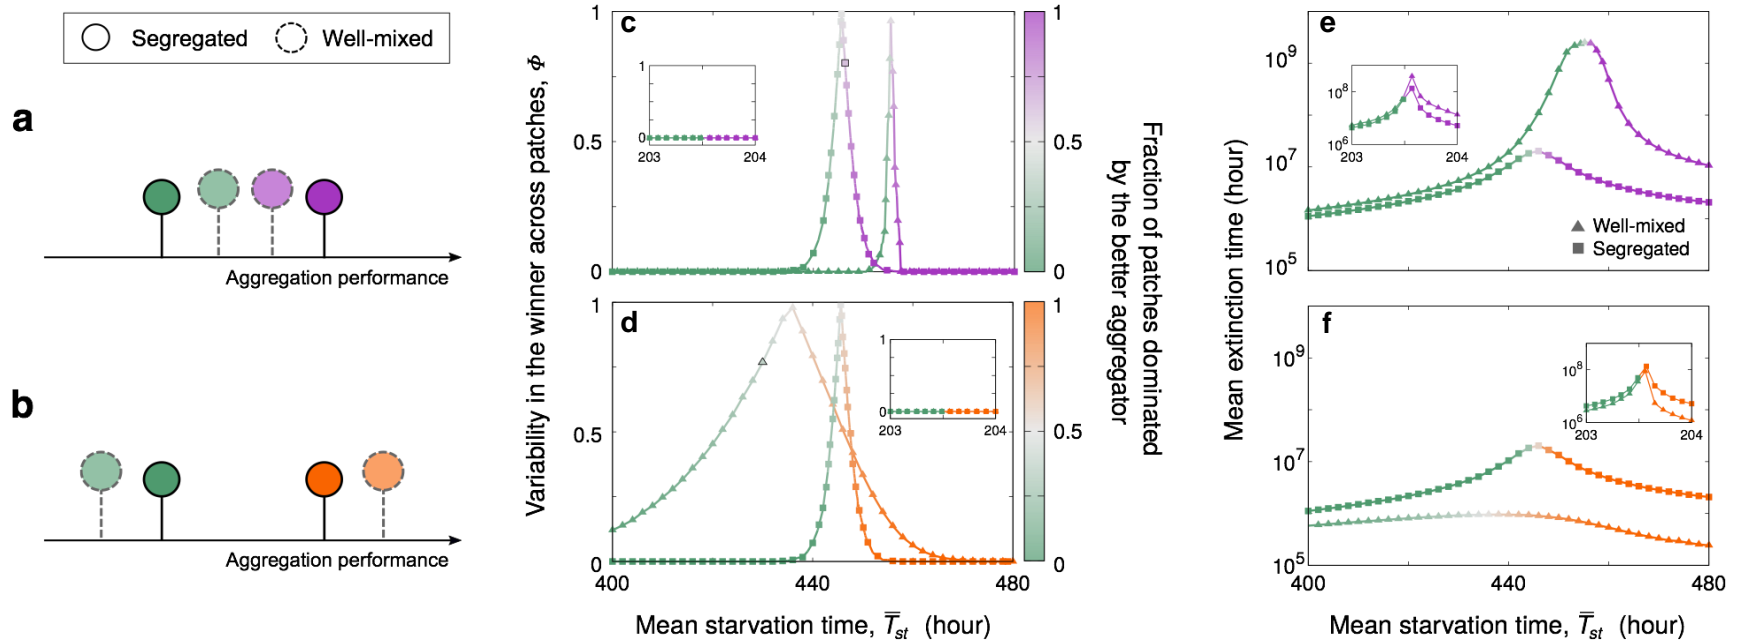

**Figure 5. Ecological implications of developmental interactions.** **a, b**, Co-development makes strains (different colors) more similar (**a**, case i) or more different (**b**, case ii) in their partitioning behavior. **c-f**, Effect of well-mixed versus segregated development on (**c, d**) the identity of the winner and (**e, f**) extinction times. Theoretical dynamics in the two environments whose symbols have a black boundary are shown in Fig. 6. Panels **c, e** and **d, f** are predictions for the pairs of strains in Figures S7a and S7c, respectively. Green strain is the same across all panels. Main panels, stochastic environments; insets, deterministic environments (see Methods). Color gradients indicate the change in the fraction of patches dominated by each of the mixed strains. Parameterization as in Fig. S7a,c

**a** Strains converge in their partitioning behavior (case i).

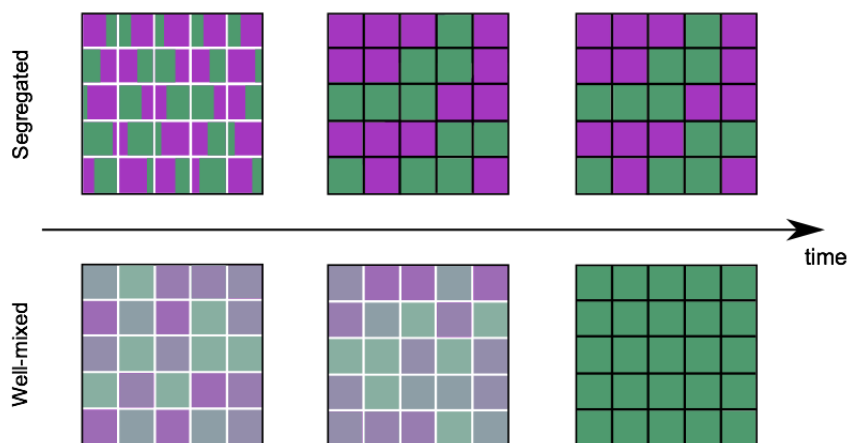

**b** Strains diverge in their partitioning behavior (case ii).

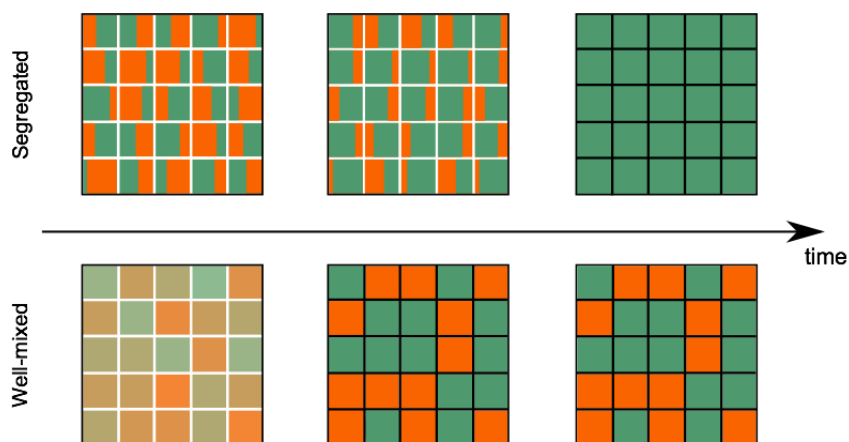

**Figure 6. Model results of the effects of developmental interactions on transient alpha-diversity and stationary beta-diversity. a,b,** White interior boundaries symbolize a transient patch-level dynamic; black interior boundaries symbolize a stationary patch-level dynamic. a, Strains converge in their partitioning behavior due to developmental interactions (case i). In a stochastic environment with mean starvation time  $\bar{T}_{st} = 448$  hour (symbol with black boundary in Fig. 4e), co-development induced quasi-neutrality increases transient coexistence (and transient alpha-diversity). However, it also eliminates the variability in the winner and thus co-development induced quasi-neutrality eliminates stationary beta-diversity. b, Strains diverge in their partitioning behavior due to developmental interactions (case ii). In a stochastic environment with mean starvation time  $\bar{T}_{st} = 430$  hour (symbol with black boundary in Fig. 4e), co-development induced character displacement has the opposite effect from (a): the mean extinction time decreases (decreased transient alpha-diversity) but the variability in the winner across patches increases compared to segregated development (increased stationary beta-diversity).

## Supplementary Material

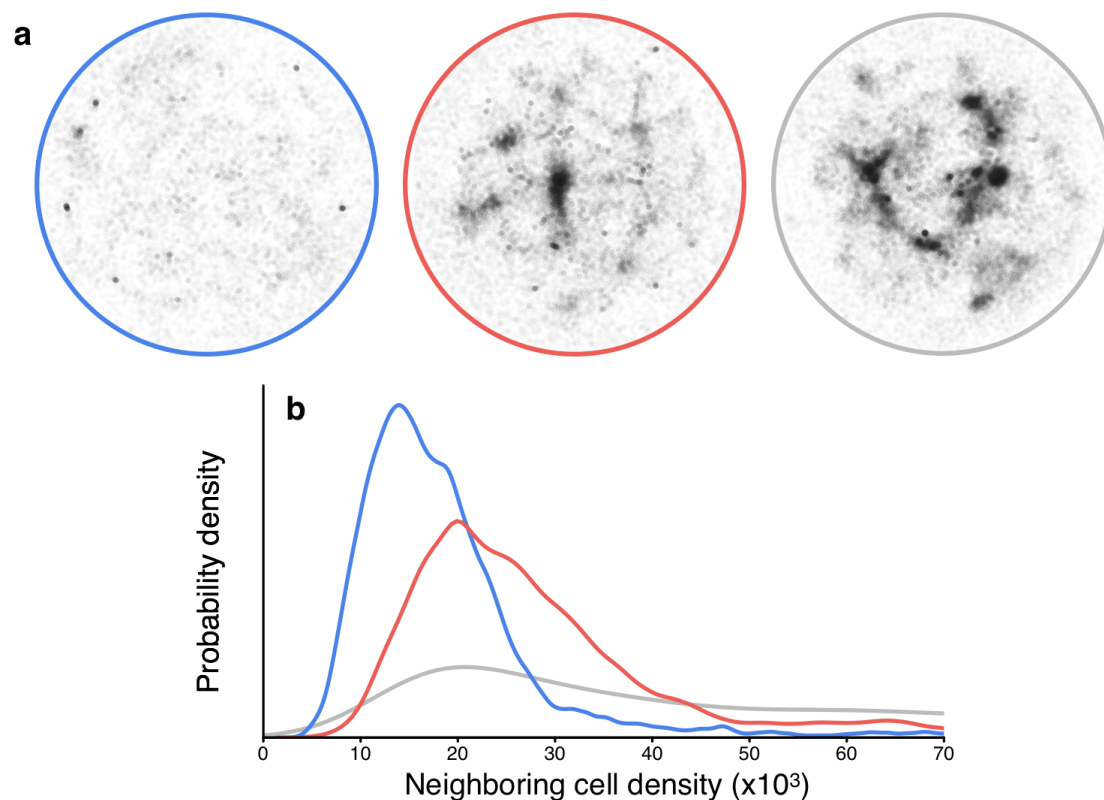

**Figure S1. Experimental loner spatial distributions.** **a**, Representative loner position maps are shown for each of the three strains (NC28.1 in blue, NC85.2 in red and NC34.1 in grey) plated on 3% agar. The position of each cell is plotted such that darker regions represent regions densely packed with loners. **b**, Characteristic loner spatial patterns for each strain are expressed as the probability distribution of local cell densities (see Methods). Broader peaks and fatter distribution tails (such as for NC34.1) correspond to more heterogeneously distributed loner cells.



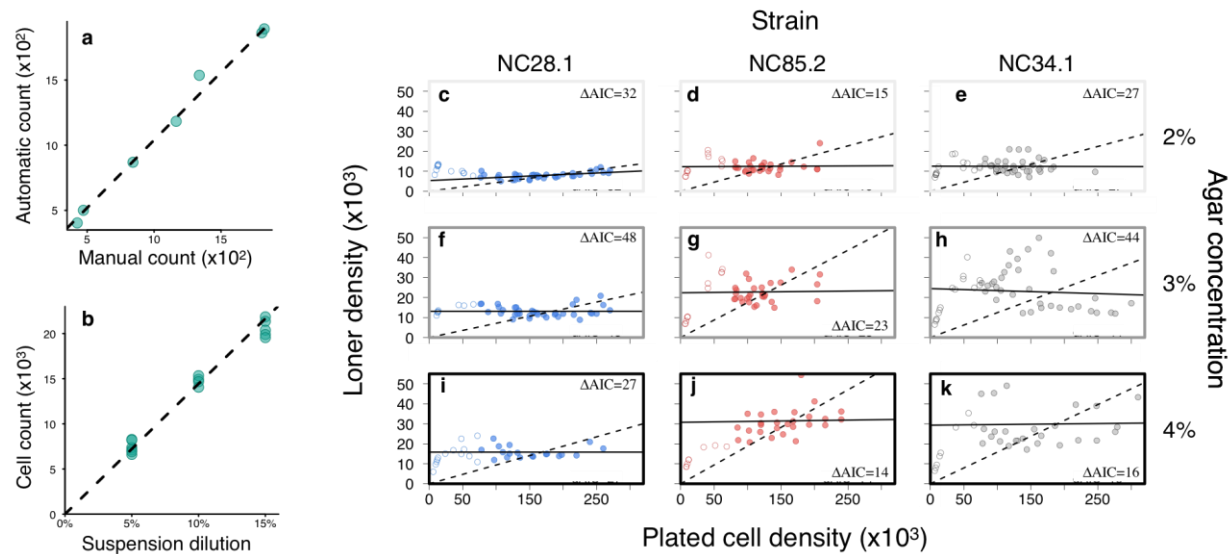

**Figure S2. Experimental loner counts.** **a**, Loners in regions with varying loner densities were algorithmically counted and plotted against manual (by eye) counts for those same regions. Dashed line = automatic and manual counts coincide. The dispersion around the line is a measure of the counting error. **b**, Cell counts in experiments realized with dilutions from a same cell suspension. Cell densities were below the aggregation threshold. Dashed line = linear regression with intercept anchored at zero. The inclination is a measure of the cell density of the initial suspension, and the dispersion around the regression line is a measure of the error introduced whenever a dilution is made. **c-k**, Loner counts are shown as a function of initial cell plating densities for each of the three strains and each of the three substrate agar concentrations. For initial plating densities above  $7.5 \times 10^4$  cells/cm<sup>2</sup>, aggregation occurs for all strains and substrates. To test if above this critical cell density the decision to aggregate is context-independent, those samples with high initial plating densities (filled circles) were used to fit linear Gaussian models with 0 intercept (dashed lines). These zero-intercept models were contrasted to linear Gaussian models with a free intercept parameter (solid lines).  $\Delta$ AIC, the difference in AIC (Akaike Information Criterion) between the 0-intercept and free-intercept models, shows that the latter outperformed the former for all substrates and strains, indicating that the decision to aggregate is context-dependent. Moreover, the inclines of the best fitting linear models are not significantly different from zero for all but the best aggregating conditions (strain NC28.1 on 2% agar substrates), and even then only weakly positive. This indicates that loner densities plateau at high initial plating densities.

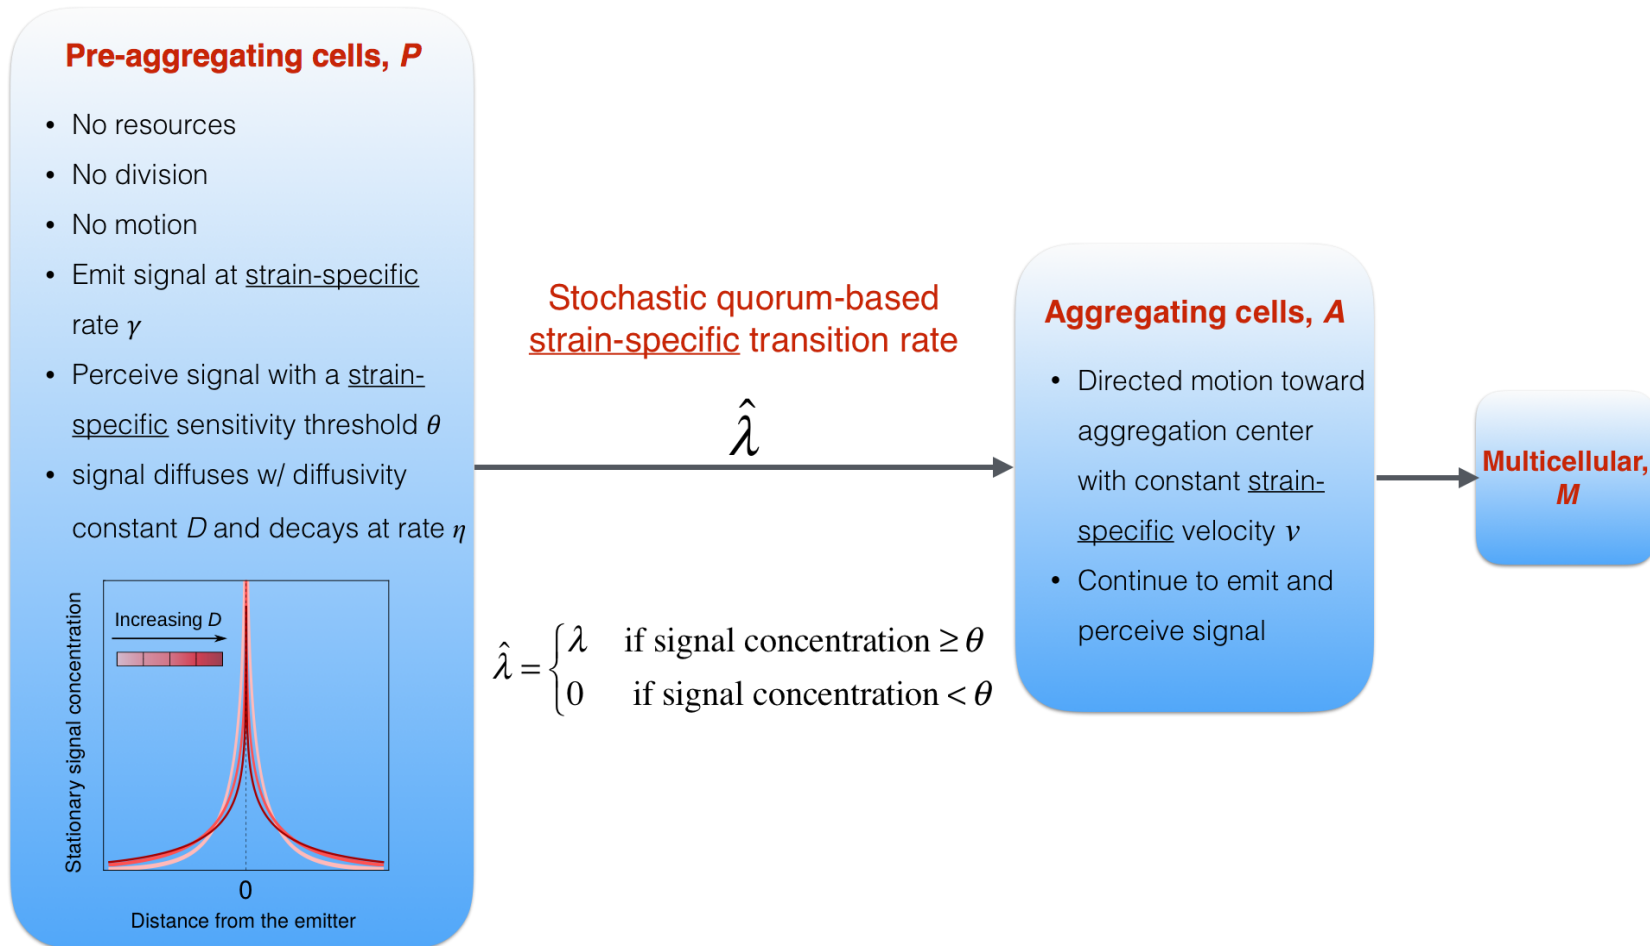

**Figure S3. Schematic of the developmental model.** We formulated an individual based model approach in which cells can be in three possible internal states: pre-aggregating,  $P$ ; aggregating,  $A$ ; and multicellular,  $M$ . Each state has different properties, listed in the blue boxes. The transitions between states occur only in one direction, as indicated by the grey arrows. The  $P$ -to- $A$  transition is based on quorum sensing and it occurs at a strain-specific rate,  $\lambda$ ; for each time step  $dt$ , if the density of signals is above the strain-specific sensitivity threshold,  $P$ -cells have a probability  $\lambda dt$  of becoming  $A$ -cells. The transition from aggregation to multicellularity is entirely based on movement, and it occurs when cells arrive at the aggregation center.

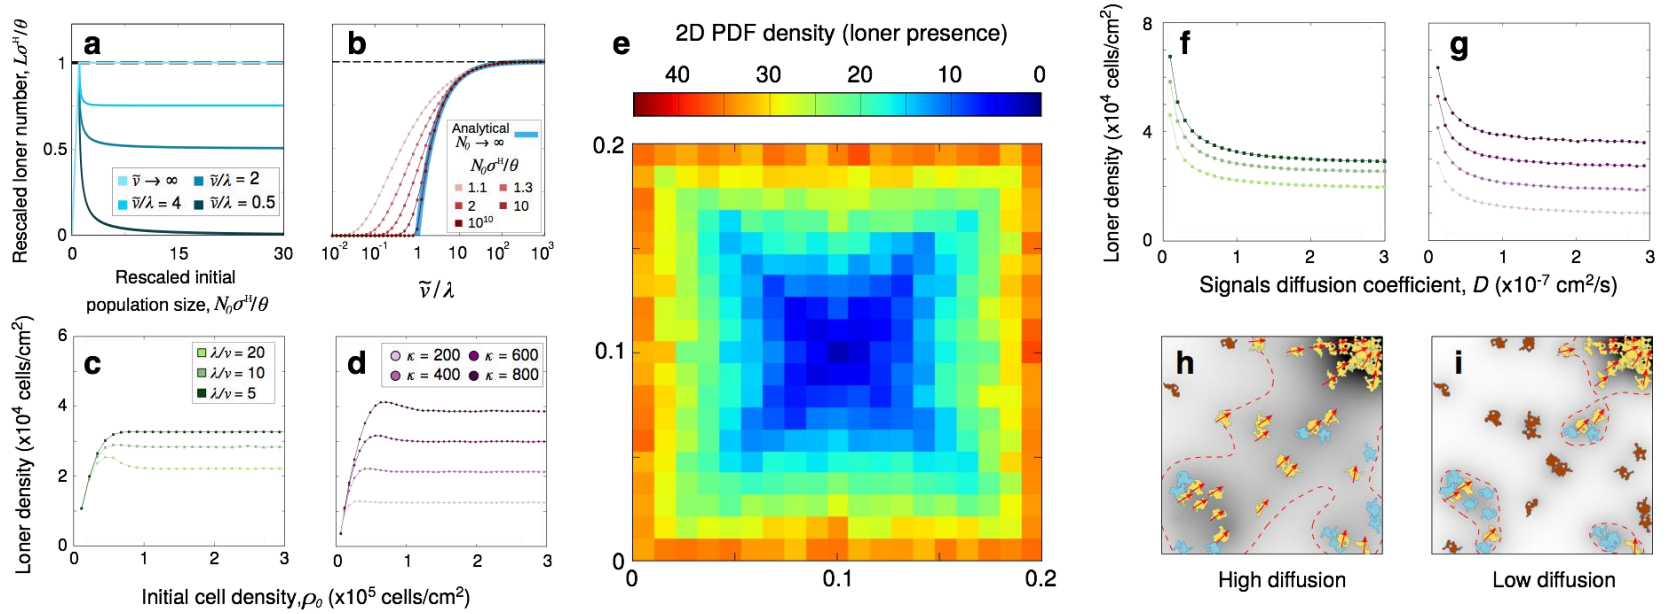

**Figure S4. Model results for clonal development.** **a**, Analytical solutions in the limit  $D \rightarrow \infty$  for the rescaled number of loners versus the rescaled initial population size (Eqs. (2.13), (2.15), and (2.16) in the SI). **b**, Phase separation between perfectly synchronized (no loners) and asynchronous (loners) development in the limit  $D \rightarrow \infty$ . Red curves are obtained *via* numerical integration of Eqs. (2.11) and (2.12) in the SI for different initial population sizes; the blue-thick curve corresponds to the analytical result in the limit  $N_0 \rightarrow \infty$  (Eq. (2.22) in the SI and Box 1 in the main text). **c**, **d**, Loner density versus initial cell density when **(c)** strains differ in  $\lambda/v$  with fixed  $\kappa=500$  or **(d)** strains differ in  $\kappa$  with fixed  $\lambda=1$  and  $v=12\mu\text{m}/\text{min}$ .  $D=10^{-7}$ . **e**, Probability density function for the presence of loners; the aggregation center is at the center of the system. The histogram is computed using the spatial positions of loners from 100 independent realizations of the model with  $D=3\times 10^{-8}$ ,  $\rho_0=3\times 10^5$ ,  $\lambda=1$ ,  $\kappa=400$ . **f**, **g**, Loner density versus diffusion coefficient when: **f**, strains differ in  $\lambda/v$  with fixed  $\kappa=500$ ; **g**, strains differ in  $\kappa$  with fixed  $\lambda=1$  and  $v=12\mu\text{m}/\text{min}$ . **h**, **i**, Schematic representation of the reduction in the regions in which signal density is above the strain-specific sensitivity threshold as a result of reducing the diffusion coefficient. Dashed-red lines delineate the regions in which signal density is above a strain-specific sensitivity threshold. Color code for the cells and the concentration of signals as in Figure 2 (a-d). In **(a-g)**, non-specified parameters and units are as in Table S1.

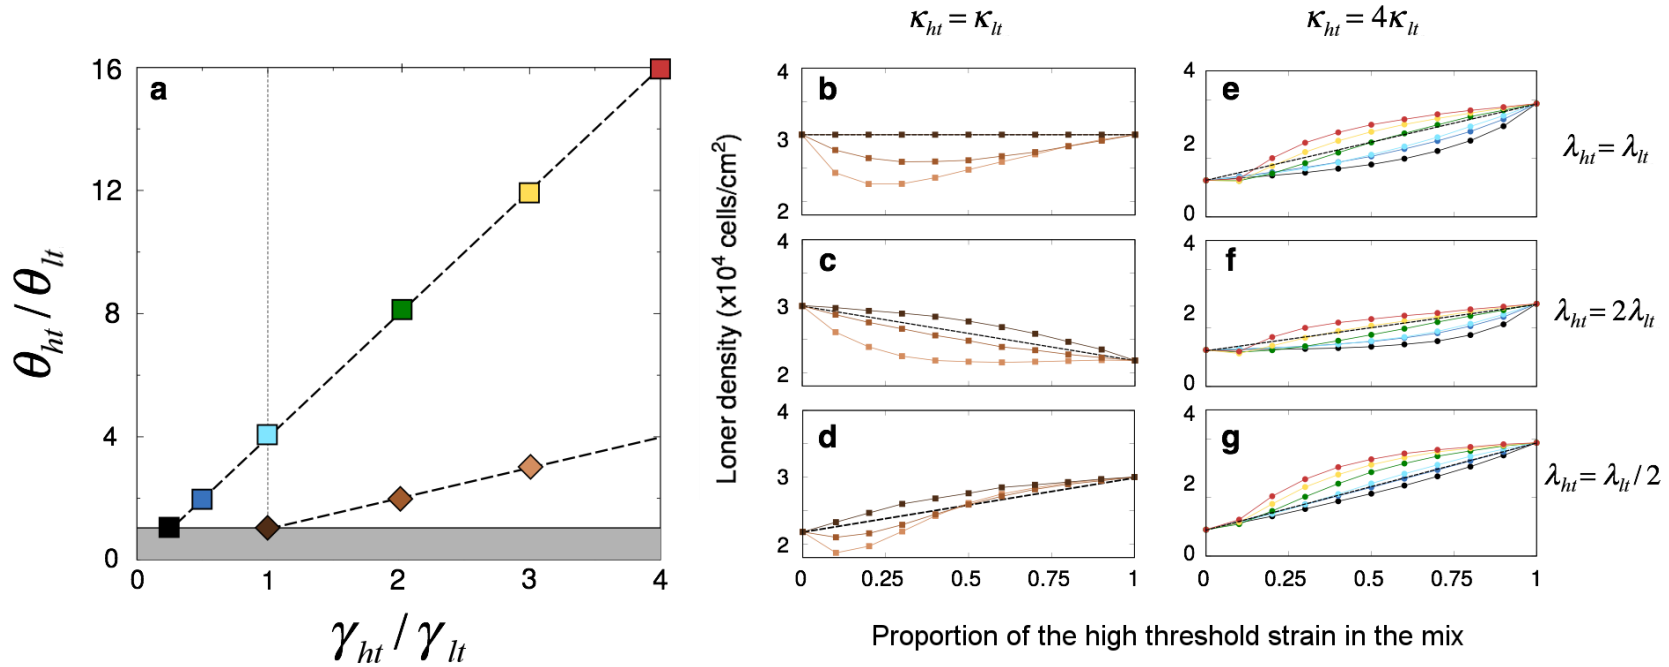

**Figure S5. Model results for co-development.** For a systematic exploration of the outcome of pairwise developmental interactions within the three-dimensional strain-specific parameter space ( $\gamma$ ,  $\theta$ ,  $\lambda$ ), strains in each mix are labeled according to their relative value of the sensitivity threshold,  $\theta$ . We use the subindex  $lt$ , standing for ‘low threshold’, to label strain-specific parameter values of the strain with the lowest  $\theta$ , and the subindex  $ht$ , standing for less sensitive, to label strain-specific parameter values of the strain with the highest  $\theta$ . **a**,  $\gamma_{ht}/\gamma_{lt}$  —  $\theta_{ht}/\theta_{lt}$  parameter space ( $\theta_{ht}/\theta_{lt} > 1$  by definition). The thick-dashed lines trace two transects of the parameter space in which  $\kappa_{ht} = \kappa_{lt}$  (lower line) and  $\kappa_{ht} = 4\kappa_{lt}$  (upper line). Densities of mixed loners are shown in **(b-d)** for the parameter values along the lower line and in **(e-g)** for parameter values along the upper line. Specific parameter relationships are indicated by the positions of the squares, whose color is maintained in the mixed-loner curves **(b-g)**. **b-d**,  $\kappa_{ht} = \kappa_{lt} = 600$ , with  $\theta_{ht} = 300$ ; and  $\theta_{lt} = 300$  (darker brown),  $\theta_{lt} = 150$  (brown),  $\theta_{lt} = 100$  (lighter brown); **b**,  $\lambda_{ht} = \lambda_{lt} = 1$ ; **c**,  $\lambda_{ht} = 2$ ,  $\lambda_{lt} = 1$ ; **d**,  $\lambda_{ht} = 1$ ,  $\lambda_{lt} = 2$ . **e-g**,  $\kappa_{ht} = 800$ , with  $\theta_{ht} = 400$  and  $\kappa_{lt} = 200$  with  $\theta_{lt} = 25, 33, 50, 100, 200, 400$  from top to bottom curve (red to black); **e**,  $\lambda_{ht} = \lambda_{lt} = 1$ ; **f**,  $\lambda_{ht} = 2$ ,  $\lambda_{lt} = 1$ ; **g**,  $\lambda_{ht} = 1$ ,  $\lambda_{lt} = 2$ . Dashed lines in **(b-g)** indicate the null hypothesis. Model parameterization shown in Table S1 with  $D = 10^{-7}$  and  $\rho_0 = 3 \times 10^5$ . Averages taken over 100 independent model realizations.

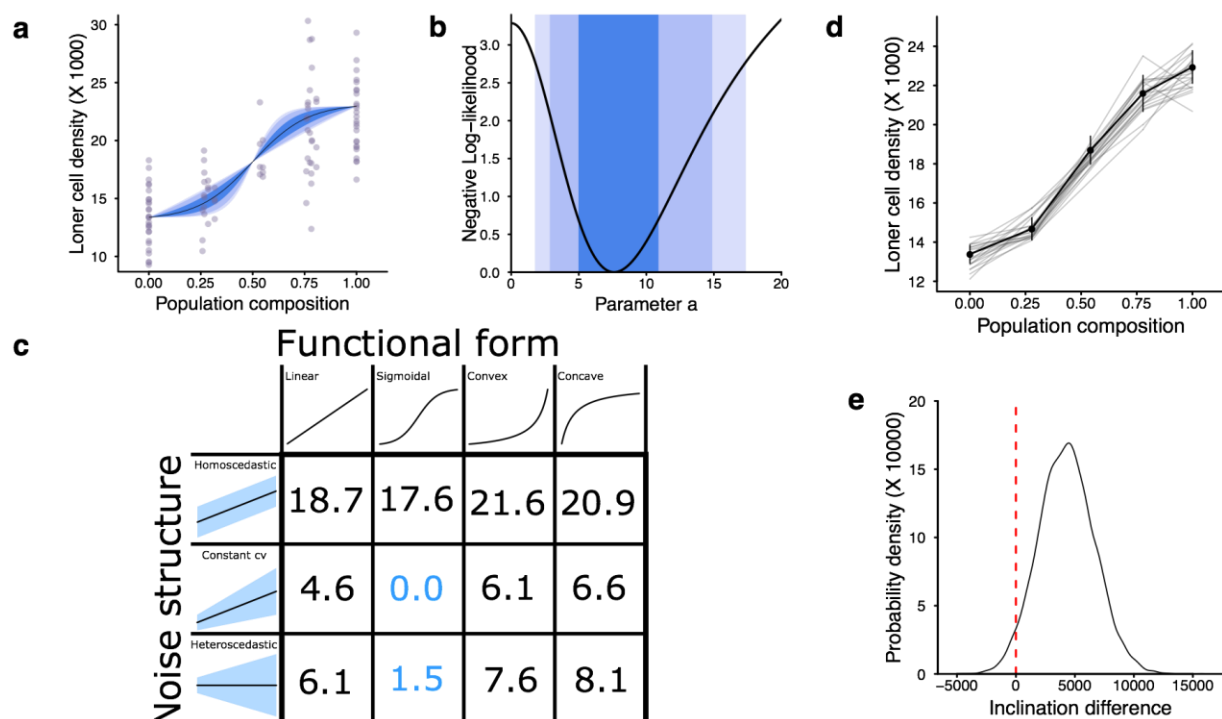

**Figure S6. Statistical analysis of non-linearity in mixed strain experiments. a-c, Maximum likelihood analysis.** **a**, Grey points = experimental mixed loner densities (see Fig. 3b). Black curve = expected loner densities for the maximum likelihood estimate of shape parameter  $a$  (see Methods). Blue areas = envelopes for the loner density curves for the confidence intervals defined by likelihood ratios of 2, 8 and 16, from darker to lighter. **b**, Negative Log-likelihood profile for the shape parameter  $a$  of the model with the best Akaike Information Criterion (AIC). Blue areas = confidence intervals defined as in (a). **c**,  $\Delta$ AIC, the difference in AIC between a given model and the best model in the candidate set. Blue values = the two best-fitting models. **d,e, Bootstrapping analysis.** For each of the five strain mix proportions, empirical distributions were bootstrapped and 50,000 data sets were constructed. **d**, Grey lines = piecewise linear regressions of 20 of these resampled data sets. Black line = the mean of all resampled data sets. Error bars = standard errors. **e**, For each resampled data set, a linear regression was performed using only the pure strain experiments and another linear regression was performed using only the mixed strain experiments. The difference between these inclinations is a measure of the non-linearity of the data set. Black line shows the probability density function of these inclination differences. Red line at zero marks linearity ( $p=0.033$ ).

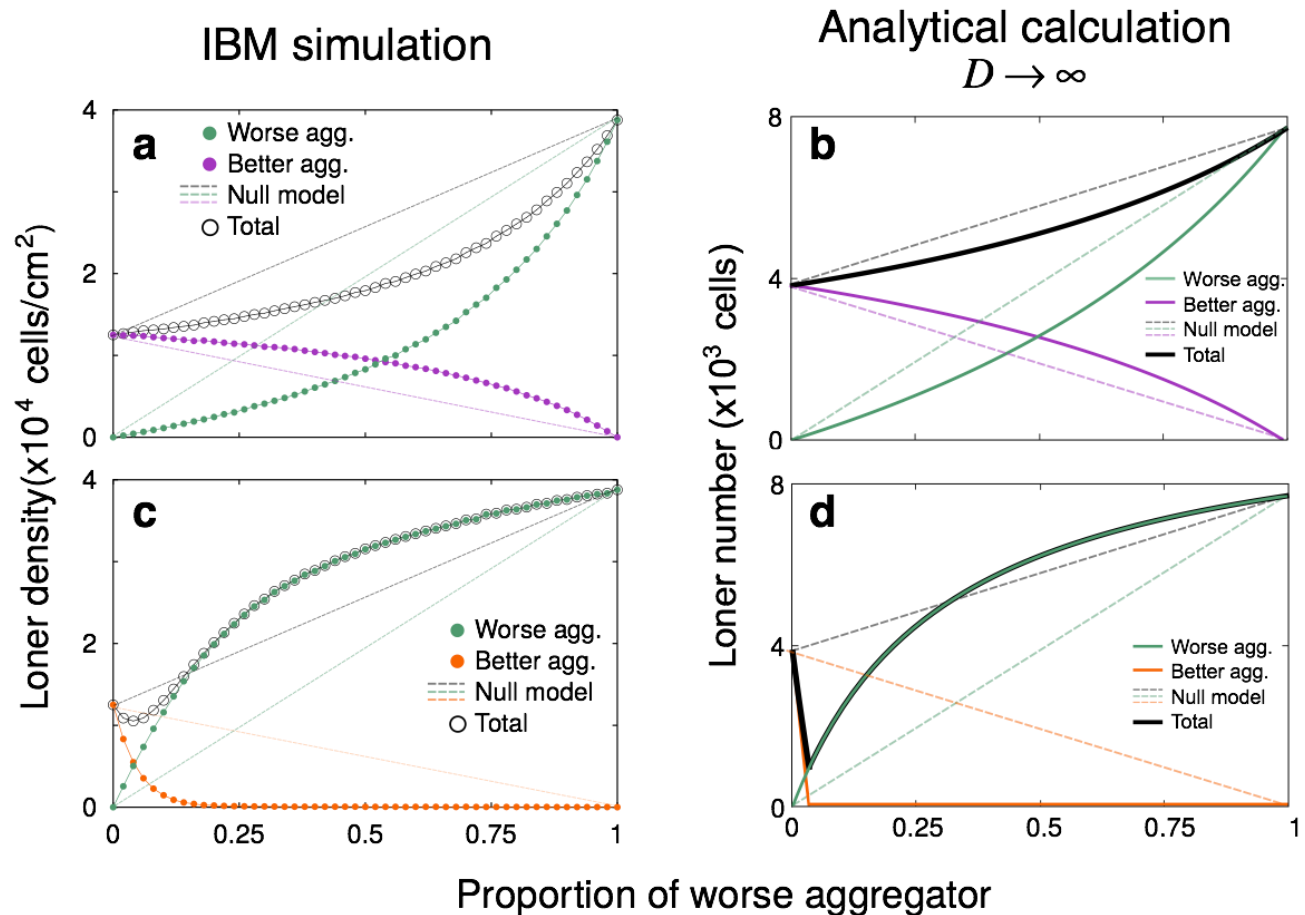

**Figure S7. Model results for the effects of co-development on individual strains.** Developmental interactions lead strains to become more similar (**a, b**) or more different (**c, d**). (**a, c**) Simulations of the individual based model,  $D = 10^{-7}$ . (**b, d**) The analytical approximations to (**a, c**) obtained in the limit  $D \rightarrow \infty$  (Eqs. (2.31) and (2.33) in the Supplementary Information), qualitatively recapitulate the behavior of mixed-loners and of the loners of each strain. Parameterization:  $\gamma_w = 0.5$ ,  $\theta_w = 400$  ( $\kappa_w = 800$ ),  $\lambda_w = \lambda_b = 1$ ,  $\kappa_b = 200$  with (**a**)  $\gamma_b = 1$  and (**b**)  $\gamma_b = 0.25$ .  $w$  = worse aggregator;  $b$  = better aggregator. Remaining parameters are as in Table S1. The color code for each strain corresponds to Fig. 4.

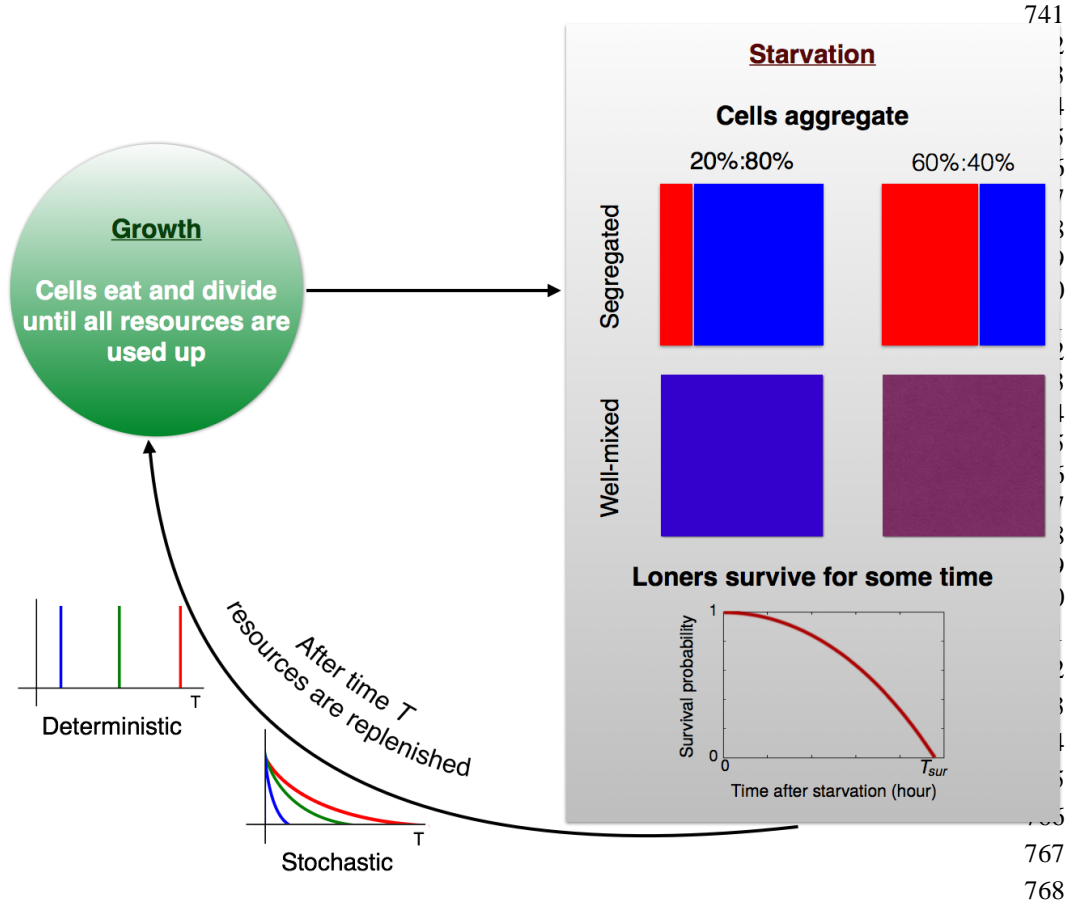

**Figure S8. Schematic of the competition model.** The model consists of a sequence of growth-starvation cycles. During growth, cells consume a shared pulse of resources and divide; during starvation, loners and aggregated cells die at different rates. The length of the starvation periods  $T_{st}$  can be either fixed (deterministic environments, defined by  $T_{st}$ ) or drawn from an exponential distribution (stochastic environments, defined by the mean starvation time  $\bar{T}_{st}$ ). Upon resource exhaustion (at the end of the growth period), the population partitions into aggregators and loners according to our population partitioning model. We compare two scenarios: *well-mixed*, where co-occurring strains co-develop and loner densities are obtained from co-development curves (e.g., as in Figure S7), or *segregated*, where strains are assumed to not mix and loners are derived from each strain's clonal development partitioning.

| Theory                        |                      |                                                                              |                    |                    | Experiment                                                   |                                                                                  |                                                                 |
|-------------------------------|----------------------|------------------------------------------------------------------------------|--------------------|--------------------|--------------------------------------------------------------|----------------------------------------------------------------------------------|-----------------------------------------------------------------|
|                               | Symbol               | Definition                                                                   | Units              | Model value        | Experimental observable                                      | Exp. value                                                                       | Ref.                                                            |
| Population partitioning model | $\lambda$            | Strain specific <i>P</i> -to- <i>A</i> transition rate                       | hour <sup>-1</sup> | Varied             | --                                                           |                                                                                  |                                                                 |
|                               | $\theta$             | Strain-specific sensitivity threshold                                        | Kg/cm <sup>2</sup> | Varied             | --                                                           |                                                                                  |                                                                 |
|                               | $\gamma$             | Strain-specific signaling rate                                               | Kg/hour            | Varied             | --                                                           |                                                                                  |                                                                 |
|                               | $v$                  | Strain-specific <i>A</i> -cells velocity                                     | μm/min             | Varied around 12   | Velocity of aggregating cells                                | 12μm/min                                                                         | (Loomis, 2012)                                                  |
|                               | $\tilde{v}$          | Rescaled cell velocity ( $D \rightarrow \infty$ limit; see Sup. Information) | hour <sup>-1</sup> | Varied             | --                                                           |                                                                                  |                                                                 |
|                               | $N_0$                | Initial number of <i>P</i> -cells                                            | # cells            | Varied             | --                                                           |                                                                                  |                                                                 |
|                               | $\eta$               | Decay constant of the signal                                                 | min <sup>-1</sup>  | 1.2                | Parameter used for model fitting.                            |                                                                                  |                                                                 |
|                               | $D$                  | Signal diffusion coefficient                                                 | cm <sup>2</sup> /s | Varied             | cAMP diff. coeff. (2% agar)<br>CMF diff. coeff. (water film) | 4.4x10 <sup>-6</sup> cm <sup>2</sup> /s<br>8x10 <sup>-7</sup> cm <sup>2</sup> /s | (Dworkin & Keller, 1977; Song et al., 2006; Yuen & Gomer, 1994) |
| Resource competition model    | $\mu$                | Decrease rate of survival probability                                        | hour <sup>-1</sup> | 2x10 <sup>-3</sup> | Number of alive/moving loners versus time                    | 2x10 <sup>-3</sup> hour <sup>-1</sup>                                            | Fitting from (Dubravcic, 2013)                                  |
|                               | $\zeta$              | Resistance to starvation parameter                                           | --                 | 2                  |                                                              | 2                                                                                |                                                                 |
|                               | $T_{sur}$            | Loner maximum lifespan                                                       | hour               | 240                |                                                              | 240 hour                                                                         |                                                                 |
|                               | $T_{ger}$            | Spore germination time                                                       | hour               | 4                  | Mean germination time 1-3 days old spores                    | 4-8 hour                                                                         | (Cotter & Raper, 1968)                                          |
|                               | $\delta$             | Spore death rate                                                             | hour <sup>-1</sup> | 2x10 <sup>-4</sup> | --                                                           |                                                                                  |                                                                 |
|                               | $c$                  | Maximum division rate                                                        | hour <sup>-1</sup> | 0.173              | Doubling time                                                | 4 hour                                                                           | (Fey et al., 2007)                                              |
|                               | $s$                  | Spore:stalk ratio                                                            | --                 | 0.8                | Spore:stalk proportion                                       | ~ 80:20                                                                          | (Stenhouse & Williams, 1977)                                    |
|                               | $\omega$             | Spore germination success                                                    | --                 | 0.63               | Germination efficiency                                       | 0.63                                                                             | (Dubravcic et al., 2014)                                        |
|                               | $R_0, X_0$           | Food pulse size; normalized initial population size                          | # cells            | 3x10 <sup>5</sup>  | --                                                           |                                                                                  |                                                                 |
|                               | $R_{1/2}$            | Resources consumption half saturation constant                               | --                 | 0.1 $R_0$          | --                                                           |                                                                                  |                                                                 |
| $\bar{T}_{st}$                | Mean starvation time | hour                                                                         | Varied             | --                 |                                                              |                                                                                  |                                                                 |

**Table S1.** Parameterization of the two theoretical models. CMF is conditioned medium factor.



# Supplementary Information for “Eco-evolutionary significance of loners”

F.W Rossine<sup>§</sup>, R. Martinez-Garcia<sup>§</sup>, A.E. Sgro, T. Gregor\* & C.E. Tarnita\*

## Contents

|          |                                                                                                                          |          |
|----------|--------------------------------------------------------------------------------------------------------------------------|----------|
| <b>1</b> | <b>Calculation of stationary signal profile</b>                                                                          | <b>1</b> |
| <b>2</b> | <b>Analytical treatment of the developmental model in the spatially-implicit limit <math>D \rightarrow \infty</math></b> | <b>2</b> |
| 2.1      | Analytical results for the non-spatial limit $\tilde{v} \rightarrow \infty$                                              | 4        |
| 2.2      | Analytical results when $\tilde{v} = k\lambda$ or $\tilde{v} = \lambda/k$                                                | 5        |
| 2.3      | Analytical results in the large population limit $N_0 \rightarrow \infty$                                                | 5        |
| 2.4      | Analytical results for co-development of two strains with same $\lambda$ and $\tilde{v} = 2\lambda$                      | 6        |

## 1 Calculation of stationary signal profile

We assume that cells are punctual sources that release signal at a constant strain-specific rate  $\gamma$ . The signal has a spontaneous decay rate  $\eta$  and a diffusion coefficient  $D$ . Given these conditions, the equation that governs the spatiotemporal evolution of signal density,  $\sigma(x, y; t)$ , is

$$\frac{\partial \sigma(x, y; t)}{\partial t} = D \nabla^2 \sigma(x, y; t) - \eta \sigma(x, y; t), \quad (1.1)$$

The first term on the right side of Eq. (1.1) accounts for the diffusion of signal and the second term for its spontaneous decay. Here, we first solve the stationary limit ( $\partial_t = 0$ ) of Eq. (1.1) in an infinite domain, imposing as boundary conditions the facts that cells continuously release signals and that signal density goes to zero when the distance from the emitting cell tends to infinity. Subsequently, we discuss the effect of considering a finite integration domain with periodic boundary conditions.

Due to the radial symmetry of the problem, we transform Eq. (1.1) to polar coordinates, in which the partial differential equation in  $(x, y)$  becomes an ordinary differential equation in the radial coordinate  $r$  that indicates the distance to the source of the signal,

$$D \left( \frac{d^2 \sigma(r)}{dr^2} + \frac{1}{r} \frac{d\sigma(r)}{dr} \right) - \eta \sigma(r) = 0. \quad (1.2)$$

Since the position of the emitter,  $r = 0$ , is a singular point of Eq. (1.2), we will first assume that cells have a finite radius  $\tilde{r}$  and then take the limit  $\tilde{r} \rightarrow 0$ . After the transformation to polar coordinates, and assuming a finite radius for the cell, the boundary conditions can be written as,

$$\sigma_{\tilde{r}}(r \rightarrow \infty) = 0, \quad (1.3)$$

$$-2\pi\tilde{r}D \frac{d\sigma_{\tilde{r}}(r)}{dr} \Big|_{r=\tilde{r}} = \gamma. \quad (1.4)$$

Eq. (1.3) imposes the finiteness of the density, and Eq. (1.4) imposes that the amount of mass released through the boundary of the cell per unit time is constant and equal to the strain-specific emission rate  $\gamma$ . The subscript  $\tilde{r}$  in the densities accounts for the finite radius of the cells.

Equation (1.2) is the modified Bessel equation of order zero, and its general solution can be expressed as

$$\sigma_{\tilde{r}}(r) = AI_0\left(\sqrt{\frac{\eta}{D}}r\right) + BK_0\left(\sqrt{\frac{\eta}{D}}r\right), \quad (1.5)$$

where  $I_0$  and  $K_0$  are the zero order modified Bessel functions of the first, respectively second, kind. From the boundary condition of Eq. (1.3), it follows that  $A = 0$ , since  $I_0$  diverges when its argument tends to infinity.  $B$  is calculated from the second boundary condition, Eq. (1.4),

$$B = \frac{\gamma}{2\pi\tilde{r}\sqrt{\eta D}K_1\left(\sqrt{\frac{\eta}{D}}\tilde{r}\right)}, \quad (1.6)$$

where  $K_1$  is the first order modified Bessel function of the second kind and we have used that  $K_0'(r) = -K_1(r)$ .

Inserting Eq. (1.6) into (1.5), the stationary signal profile produced by a source of finite radius  $\tilde{r}$  is,

$$\sigma_{\tilde{r}}(r) = \frac{\gamma}{2\pi\tilde{r}\sqrt{\eta D}K_1\left(\sqrt{\frac{\eta}{D}}\tilde{r}\right)}K_0\left(\sqrt{\frac{\eta}{D}}r\right). \quad (1.7)$$

Finally, to obtain the profile generated by a punctual source, we take the limit  $\tilde{r} \rightarrow 0$  in Eq. (1.7),

$$\sigma(r) = \frac{\gamma}{2\pi D}K_0\left(\sqrt{\frac{\eta}{D}}r\right). \quad (1.8)$$

The solution provided by Eq. (1.8) assumes an infinite system size, whereas we perform numerical simulations of the developmental model on a finite domain of lateral length  $\ell$  with periodic boundary conditions. To impose periodic boundary conditions is equivalent to considering that the simulated finite domain corresponds to a tile embedded into an infinite lattice in which each tile is a mirroring image of the focal domain. The signal density within the focal tile is obtained by adding over the contributions of all other tiles. However, since our numerical simulations only explore a range of diffusion coefficients in which  $\sigma(\ell/2) \approx 0$ , we can truncate the sum over tiles at the nearest neighbors of the focal one. This is equivalent to calculating distances to the position of each emitting cell,  $(x_{em}, y_{em})$ , in each spatial coordinate:

$$r_x = \begin{cases} |x - x_{em}| & \text{if } |x - x_{em}| \leq \ell/2 \\ \ell - |x - x_{em}| & \text{if } |x - x_{em}| > \ell/2 \end{cases}$$

$$r_y = \begin{cases} |y - y_{em}| & \text{if } |y - y_{em}| \leq \ell/2 \\ \ell - |y - y_{em}| & \text{if } |y - y_{em}| > \ell/2 \end{cases}$$

The total distance is then given by the radial coordinate  $r$ , as  $r = \sqrt{r_x^2 + r_y^2}$ .

## 2 Analytical treatment of the developmental model in the spatially-implicit limit $D \rightarrow \infty$

The spatially-implicit limit of the individual based population-partitioning model consists of disregarding the spatial effects introduced by a finite signal diffusion coefficient (i.e. the limit  $D \rightarrow \infty$ ), but still accounting for cell movement at a finite velocity. To this end, we map cell movement into a stochastic transition in cell

state from aggregating to being multicellular, the rate of this transition is related to cell velocity,  $v$ . First, we calculate the stationary signal density produced by each cell in the limit  $D \rightarrow \infty$ . Unlike in the low  $D$  case explored in the spatially-explicit simulations, in which periodic boundary conditions were implemented considering only the nearest neighbors of the focal tile, now, since the signal spreads infinitely far, we need to include the contribution of an infinite number of tiles. This results in each cell generating a homogeneous signal distribution within the focal tile,  $\sigma^H = \mathcal{M}/\ell^2$ .  $\mathcal{M}$  is the mass of signal that is being released by each cell in the stationary limit, which can be obtained by integrating Eq. (1.8) over the entire range of distances,

$$\mathcal{M} = \int_0^\infty r\sigma(r)dr = \frac{\gamma}{2\pi\eta}. \quad (2.1)$$

Due to the conservation of the total population size  $N_0$  (since demographic events are neglected on the temporal scales of aggregation), the state of the system is fully determined by the sizes of two of the three subpopulations ( $P$ ,  $A$ , and  $M$  cells). We choose the number of cells in the  $P$ -state,  $N_P$ , and in the  $A$ -state,  $N_A$ , as state variables. The number of cells in the  $M$  state,  $N_M(t)$  (i.e., the size of the multicellular aggregate) can then be obtained from  $N_P(t) + N_A(t) + N_M(t) = N_0$ .

In order for the aggregation process to be initiated at all, a quorum must be met by the initial population (all of which are  $P$ -cells), i.e. we must have  $N_0\sigma^H > \theta$ . In the absence of a quorum, all initial cells remain as loners and therefore the total loner number is  $L = N_0$ . If there is an initial quorum, then  $P$ -cells turn into  $A$ -cells at rate  $\lambda$ ;  $A$ -cells continue to emit signal while they move in the direction of the aggregate. As  $A$ -cells eventually join the aggregate, they stop signaling and therefore the amount of signal in the system continues to decrease.  $P$ -cells continue to become  $A$ -cells at rate  $\lambda$  only if the total signal density  $[N_P(t) + N_A(t)]\sigma^H$  remains above the strain-specific sensitivity threshold,  $\theta$ . The  $P$ -to- $A$  transition rate as a function of time is thus given by

$$\hat{\lambda}(t) = \lambda\Theta(\sigma^H [N_P(t) + N_A(t)] - \theta), \quad (2.2)$$

where  $\Theta$  is the Heaviside function, which takes value 1 for non-negative arguments and 0 for negative arguments. Therefore, omitting the temporal dependence in  $\hat{\lambda}$ ,  $N_A$  and  $N_P$ ,

$$\hat{\lambda} = \begin{cases} \lambda & \text{if } N_P + N_A \geq \theta/\sigma^H \\ 0 & \text{otherwise.} \end{cases} \quad (2.3)$$

The rate at which  $A$ -cells stick to the aggregate and become  $M$ -cells can be approximated by the inverse of the time needed to cover the mean distance to the aggregate at a velocity  $v$ , i.e.

$$\tilde{v} = \frac{v}{\langle d \rangle} \quad (2.4)$$

where  $\langle d \rangle$  is a characteristic spatial scale of the aggregation territory (mean distance to the aggregation center). For simplicity, we will fix  $\langle d \rangle = 1$  in the following and refer to  $\tilde{v}$  as a rescaled velocity.

Therefore, the aggregation process can be mapped to a sequence of two stochastic reactions, each of which occurs at a different rate,

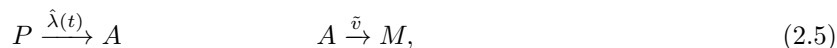

This stochastic process is fully described by a master equation, which gives the temporal evolution of the probability  $g(N_P, N_A; t)$  of finding the system in a state  $(N_P, N_A)$  at time  $t$ ,

$$\frac{\partial g(N_P, N_A; t)}{\partial t} = \tilde{v}(N_A + 1)g(N_P, N_A + 1; t) + \hat{\lambda}(N_P + 1)g(N_P + 1, N_A - 1; t) \quad (2.6)$$

$$- (N_P\hat{\lambda} + N_A\tilde{v})g(N_P, N_A; t) \quad (2.7)$$

Following standard procedures, from the Master Equation (2.7) we can derive a system of coupled ordinary differential equations for the mean value of each subpopulation size,

$$\dot{p}(t) = -\hat{\lambda}p(t) \quad (2.8)$$

$$\dot{a}(t) = \hat{\lambda}p(t) - \tilde{v}a(t) \quad (2.9)$$

where  $p(t)$  and  $a(t)$  are the mean values of  $N_P$ , respectively  $N_A$ , at time  $t$ . The dot over  $a$  and  $p$  on the left side of the equation indicates a time derivative. System (2.8) can be solved analytically, using that initially all cells are in the pre-aggregation state, i.e.  $p(0) = N_0$ ,  $a(0) = 0$ . Then

$$p(t) = N_0 e^{-\hat{\lambda}t} \quad (2.10)$$

$$a(t) = \frac{\hat{\lambda}N_0}{\tilde{v} - \hat{\lambda}} \left( e^{-\hat{\lambda}t} - e^{-\tilde{v}t} \right). \quad (2.11)$$

Since the ultimate objective of this approximation is to obtain analytical expressions for the loner-aggregator partitioning behavior, an important observable is the time  $\tau$  at which the decaying signal density exactly equals the strain-specific sensitivity threshold.  $\tau$  can thus be obtained by solving

$$\theta = \sigma^H [p(\tau) + a(\tau)] = \frac{\sigma^H N_0}{\tilde{v} - \hat{\lambda}} (\tilde{v} e^{-\hat{\lambda}\tau} - \lambda e^{-\tilde{v}\tau}), \quad (2.12)$$

where we have used the fact that  $\hat{\lambda}(\tau) = \lambda$  according to Eq. (2.2). Since aggregating cells also contribute to the pool of signal,  $\tau$  does not represent the aggregation time; after a time  $\tau$ , any  $A$ -cell in the system will continue to move towards the aggregate at rate  $\tilde{v}$  until  $a(\tau + \Delta t) = 0$ . However, importantly,  $\tau$  gives the time at which the last  $P \rightarrow A$  transition occurs. Therefore, all cells that are still in the  $P$ -state at time  $\tau$  will remain as loners and we can find the total number of loners as

$$L = \begin{cases} p(\tau) & \text{if } N_0 \sigma^H > \theta \quad (\text{i.e. a quorum is met}) \\ N_0 & \text{otherwise} \end{cases} \quad (2.13)$$

Henceforth we will focus on the former case, when aggregation does get initiated.

In general, we can not solve for  $\tau$  in Eq. (2.12) and therefore we can not determine the number of loners analytically. Below, we try to circumvent this problem by looking at a few special cases.

## 2.1 Analytical results for the non-spatial limit $\tilde{v} \rightarrow \infty$

In this limit, cells spend an infinitesimally short time in the  $A$  state and therefore  $p(t) + a(t) \rightarrow N_0 e^{-\lambda t}$ . To obtain  $\tau$  we

then solve  $\sigma^H N_0 e^{-\lambda/\tau} = \theta$ , which gives  $\tau = \ln \left( \frac{\sigma^H N_0}{\theta} \right) / \lambda$ . Then, from Eq. (2.13), the number of loners, when there is a quorum for aggregation, is

$$L = \exp(-\lambda/\tau) = \theta / \sigma^H. \quad (2.14)$$

Therefore, in this limit,  $\lambda$  gives the time scale of the aggregation but it has no effect on the number of loners, which is equal to the sensing-to-signal ratio.

## 2.2 Analytical results when $\tilde{v} = k\lambda$ or $\tilde{v} = \lambda/k$

In the special case  $\tilde{v} = 2\lambda$ , using the change of variables  $y = \exp(-\lambda\tau)$ , (2.12) becomes a quadratic equation from which  $y$  and thus  $\tau$  can be obtained,

$$y^2 - 2y + \frac{\theta}{N_0\sigma^H} = 0. \quad (2.15)$$

Given the definition of  $y$ , Eq. (2.15) only has physical meaning in the domain  $y \in (0, 1]$ . Within that interval, if a quorum exists (i.e.  $N_0 > \theta/\sigma^H$ ), Eq. (2.15) has a single root, which determines the number of loners  $p(\tau)$  according to Eq. (2.10) and the definition of  $y$ :

$$L = N_0 y = N_0 \left( 1 - \sqrt{1 - \frac{\theta}{N_0\sigma^H}} \right). \quad (2.16)$$

In the limit  $N_0 \rightarrow \infty$ , Eq. (2.16) tends to  $\theta/(2\sigma^H)$ , as predicted by Eq. (1) in the main text (also Eq. (2.23) below).

In the other special case,  $\tilde{v} = \lambda/2$ , Eq. (2.12) becomes again Eq. (2.15) using the change of variables  $y = \exp(-\tilde{v}t)$ . Thus, if there is a quorum for aggregation (i.e.  $N_0 > \theta/\sigma^H$ ) the number of loners is

$$L = N_0 y^2 = N_0 \left( 1 - \sqrt{1 - \frac{\theta}{N_0\sigma^H}} \right)^2, \quad (2.17)$$

which tends to 0 in the limit  $N_0 \rightarrow \infty$ , as predicted by the phase separation defined by Eq. (1) of the main text (also Eq. (2.23) below).

In general, the changes of variables introduced here,  $y = \exp(-\lambda t)$  and  $y = \exp(-\tilde{v}t)$ , will turn Eq. (2.12) into a polynomial equation of degree  $n$  provided that  $\tilde{v} = n\lambda$  or  $\tilde{v} = \lambda/n$ . If the root of such a polynomial within the interval  $y \in (0, 1]$  can be obtained, then an expression for the number of loners as a function of the initial population  $N_0$  is accessible. In Figure S4, we show the two cases obtained here (Eqs. (2.16) and (2.17)), as well as the non-spatial limit  $\tilde{v} \rightarrow \infty$ . In addition, we also show the  $\tilde{v} = 4\lambda$  case, where the equivalent to Eq. (2.15) is a 4-th degree polynomial, whose root in the interval  $y \in (0, 1]$  we obtained using *Mathematica 11.1*.

## 2.3 Analytical results in the large population limit $N_0 \rightarrow \infty$

In the limit of infinitely large initial population size, a quorum is always met. Therefore, from Eq. (2.13), the number of loners is

$$L = \lim_{N_0 \rightarrow \infty} p(\tau) = \lim_{N_0 \rightarrow \infty} N_0 e^{-\lambda\tau}. \quad (2.18)$$

At the end of this section, we prove that  $p$  is a positive and monotonically decreasing function of  $N_0$ ; therefore  $L$  always exists and is greater than or equal to zero. This also implies that  $\lim_{N_0 \rightarrow \infty} e^{-\lambda\tau} = 0$  (otherwise  $L$  would not be finite); applying L'Hôpital's rule to Eq. (2.18), we obtain

$$L = \frac{N_0^2 \tilde{v} \sigma^H [e^{-2\lambda\tau} - e^{-\lambda\tau} e^{-\tilde{v}\tau}]}{\theta(\tilde{v} - \lambda)}, \quad (2.19)$$

where we have used Eq. (2.26) for the derivative of  $\tau$  with respect to  $N_0$ . Finally, defining  $Q \equiv \lim_{N_0 \rightarrow \infty} N_0 e^{-\tilde{v}\tau}$  and rearranging terms, we get

$$L = Q + \frac{\theta(\tilde{v} - \lambda)}{\sigma^H \tilde{v}}. \quad (2.20)$$

To obtain an independent expression for  $L$  we need another, non-redundant relationship between  $L$  and

$$N_0 \left[ \frac{e^{-\lambda\tau}}{\lambda} - \frac{e^{-\tilde{v}\tau}}{\tilde{v}} \right] = \frac{(\tilde{v} - \lambda)\theta}{\tilde{v}\lambda\sigma^H}, \quad (2.21)$$

and then taking the limit  $N_0 \rightarrow \infty$  in Eq. (2.21),

$$\frac{L}{\lambda} - \frac{Q}{\tilde{v}} = \frac{(\tilde{v} - \lambda)\theta}{\tilde{v}\lambda\sigma^H}. \quad (2.22)$$

Solving for  $L$  in Eqs. (2.19) and (2.22), we find

$$L = \begin{cases} 2\pi\eta\ell^2 \frac{\theta}{\gamma} \left(1 - \frac{\lambda}{\tilde{v}}\right) & \text{if } \lambda \leq \tilde{v} \\ 0 & \text{if } \lambda > \tilde{v}, \end{cases} \quad (2.23)$$

where we have used the fact that  $\sigma^H = \frac{\gamma}{2\pi\eta\ell^2}$  (see Section 2). In the limit  $N_0 \rightarrow \infty$ , there is thus a phase separation given by the relative magnitudes of the  $P$ -to- $A$  and  $A$ -to- $M$  transition rates.

**Proof of the existence of  $L$ .** In order to obtain in Eq. 2.23 the limit of  $p(\tau)$  for infinite initial population sizes, we first need to prove that such a limit exists and is finite. To this end, we will first calculate the derivative of  $p(\tau)$  with respect to  $N_0$ :

$$\frac{dp(\tau)}{dN_0} = e^{-\lambda\tau} - N_0\lambda\tau'(N_0)e^{-\lambda\tau}, \quad (2.24)$$

Although Eq. (2.12) for  $\tau$  cannot be solved in general, we can obtain an analytical expression for the derivative of  $\tau$  with respect to  $N_0$  using implicit differentiation. We differentiate both sides of Eq. (2.12)

$$[\tilde{v}e^{-\lambda\tau} - \lambda e^{-\tilde{v}\tau}] + N_0 [-\lambda\tilde{v}\tau'(N_0)e^{-\lambda\tau} + \tilde{v}\lambda\tau'(N_0)e^{-\tilde{v}\tau}] = 0, \quad (2.25)$$

and solving for  $\tau'(N_0)$ , we obtain

$$\tau'(N_0) = \frac{1}{\tilde{v}\lambda N_0} \left[ \frac{\tilde{v}e^{-\lambda\tau} - \lambda e^{-\tilde{v}\tau}}{e^{-\lambda\tau} - e^{-\tilde{v}\tau}} \right], \quad (2.26)$$

which is always positive for any relationship between  $\tilde{v}$  and  $\lambda$ . Using Eq. (2.26) in Eq. (2.24), we find

$$\frac{dp(\tau)}{dN_0} = e^{-\lambda\tau} \left[ 1 - \frac{e^{-\lambda\tau} - \frac{\lambda}{\tilde{v}}e^{-\tilde{v}\tau}}{e^{-\lambda\tau} - e^{-\tilde{v}\tau}} \right] = \frac{e^{-(\lambda+\tilde{v})\tau} \left( \frac{\lambda}{\tilde{v}} - 1 \right)}{e^{-\lambda\tau} - e^{-\tilde{v}\tau}} \quad (2.27)$$

Since the numerator and the denominator of Eq. (2.27) have opposite signs for both  $\lambda > \tilde{v}$  and  $\tilde{v} > \lambda$ ,  $dp(\tau)/dN_0$  is always negative. Thus,  $p(\tau)$  is a decreasing function of  $N_0$ . Since  $p$  is a non-negative and decreasing function, the limit of  $p(\tau)$  as  $N_0$  tends to infinity exists and is always greater than or equal to zero. Importantly, due to the symmetry between  $p$  and  $N_0 \exp(-\tilde{v}\tau)$ , the limit  $Q$  defined in the calculation of  $L$  also exists and has the same properties as  $L$ .

## 2.4 Analytical results for co-development of two strains with same $\lambda$ and $\tilde{v} = 2\lambda$

In mixed development, we consider two strains defined by the set of strain-specific parameters  $(\lambda, \theta, \gamma)$ .  $\lambda$  and  $\theta$  have been defined above, and  $\gamma$  determines the strain-specific signal density  $\sigma^H$  released by each cell. We use the term *high-threshold strain* and the notation  $ht$  for the strain with the higher signal sensitivity threshold and *low-threshold strain* ( $lt$ ) for the one with the lower signal-sensitivity threshold. Thus,  $\theta_{ht} > \theta_{lt}$ .

$$\frac{\theta_{ht}}{\sigma_{ht}^H} > \frac{\theta_{lt}}{\sigma_{lt}^H}. \quad (2.28)$$

To obtain the mixed loners, we generalize Eq. (2.12) to the two-strain case,

$$\sigma_{ht}^H [p_{ht}(\tau_{ht}) + a_{ht}(\tau_{ht})] + \sigma_{lt}^H [p_{lt}(\tau_{lt}) + a_{lt}(\tau_{lt})] = \theta_{ht}, \quad (2.29)$$

where  $\tau_{ht}$  is the time at which the density of signals reaches the strain-specific sensitivity of the high-threshold strain. Therefore, for  $t > \tau_{ht}$ ,  $\hat{\lambda}_{ht} = 0$  and only cells of the low-threshold strain continue to aggregate ( $\hat{\lambda}_{lt} \neq 0$ ).

Let  $\Pi$  be the proportion of the high-threshold strain in the mix;  $\Pi N_0$  is thus the initial population of the high-threshold strain, and  $(1 - \Pi)N_0$  the initial population of the low-threshold strain. Substituting the expressions for  $a(t)$  and  $p(t)$  obtained in Eqs. (2.10) and (2.11), Eq. (2.29) becomes

$$\frac{N_0 \Pi \sigma_{ht}^H}{\tilde{v} - \lambda_{ht}} [\tilde{v} e^{-\lambda_{ht} \tau_{ht}} - \lambda_{ht} e^{-\tilde{v} \tau_{ht}}] + \frac{N_0 (1 - \Pi) \sigma_{lt}^H}{\tilde{v} - \lambda_{lt}} [\tilde{v} e^{-\lambda_{lt} \tau_{ht}} - \lambda_{lt} e^{-\tilde{v} \tau_{ht}}] = \theta_{ht}. \quad (2.30)$$

$\tau_{ht}$  cannot be obtained from Eq. (2.30) in general. However, since we assume in this section that  $\lambda_{ht} = \lambda_{lt} \equiv \lambda$  and  $\tilde{v} = 2\lambda$ , then the change of variables  $y = \exp(-\lambda \tau_{ht})$  turns Eq. (2.30) into a quadratic equation of the form

$$y^2 - 2y + \frac{\theta_{ht}}{N_0 \Pi (\sigma_{ht}^H - \sigma_{lt}^H) + N_0 \sigma_{lt}^H} = 0, \quad (2.31)$$

that has only one root in the interval  $(0, 1]$ . Using that root, we obtain the number of loners of the high-threshold strain,

$$L_{ht} = \Pi N_0 y = \Pi N_0 \left( 1 - \sqrt{1 - \frac{\theta_{ht}}{N_0 \Pi (\sigma_{ht}^H - \sigma_{lt}^H) + N_0 \sigma_{lt}^H}} \right) \quad (2.32)$$

After  $\tau_{ht}$ , only cells of the low-threshold strain continue to aggregate. The number of loners left by the low-threshold strain is determined by the relationship between  $L_{ht}$ ,  $\sigma_{ht}^H$ , and  $\theta_{lt}$ :

- If  $\sigma_{ht}^H L_{ht} \geq \theta_{lt}$  the loners of the high-threshold strain provide quorum for a full aggregation of the low-threshold strain and therefore  $L_{lt} = 0$ .
- If  $\sigma_{ht}^H L_{ht} < \theta_{lt}$ , the low-threshold strain stops aggregating at a time  $\tau_{lt} > \tau_{ht}$ , such that

$$\sigma_{ht}^H L_{ht} + \sigma_{lt}^H p_{lt}(\tau_{lt}) = \theta_{lt}, \quad (2.33)$$

which gives the number of loners for the low-threshold strain

$$p_{lt}(\tau_{lt}) \equiv L_{lt} = \frac{\theta_{lt}}{\sigma_{lt}^H} - \frac{\sigma_{ht}^H \Pi N_0}{\sigma_{lt}^H} \left( 1 - \sqrt{1 - \frac{\theta_{ht}}{N_0 \Pi (\sigma_{ht}^H - \sigma_{lt}^H) + N_0 \sigma_{lt}^H}} \right) \quad (2.34)$$

The transition from one outcome to the other occurs at a population composition  $\tilde{\Pi}$  such that  $\sigma_{ht}^H L_{ht} = \theta_{lt}$ . Using Eq. (2.32) for the number of loners of the high-threshold strain, we obtain

$$\tilde{\Pi} = \frac{2\theta_{lt}\sigma_{lt}^H}{\sigma_{ht}^H(\theta_{ht} - 2\theta_{lt}) + 2\theta_{lt}\sigma_{lt}^H}. \quad (2.35)$$
